## RESEARCH ARTICLE

# Microtubule-based nucleation results in a large sensitivity to cell geometry of the plant cortical array

Marco Saltini , Eva E. Deinum \*

Mathematical and Statistical Methods (Biometris), Wageningen University, Wageningen, The Netherlands

\* [eva.deinum@wur.nl](mailto:eva.deinum@wur.nl)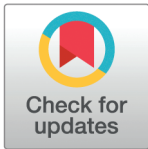

## Abstract

Many plant cell functions, including cell morphogenesis and anisotropic growth, rely on the self-organisation of cortical microtubules into aligned arrays with the correct orientation. An important ongoing debate is how cell geometry, wall mechanical stresses, and other internal and external cues are integrated to determine the orientation of the cortical array. Here, we demonstrate that microtubule-based nucleation can markedly shift the balance between these often competing directional cues. For this, we developed a novel, more realistic model for microtubule-based nucleation in the simulation platform CorticalSim, which avoids the longstanding inhomogeneity problem stemming from previous, less realistic models for microtubule-based nucleation. We show that microtubule-based nucleation increases the sensitivity of the array to cell geometry, and extends the regime of spontaneous alignment compared to isotropic nucleation. In the case of cylindrical cell shapes, we show that this translates into a strong tendency to align in the transverse direction rather than along the vertical axis, and this is robust against small directional cues favouring the longitudinal direction. Comparing various cylinders and boxes, we show that different nucleation mechanisms result in different preferred array orientations, with the largest differences on cylinders. Our model provides a powerful tool for investigating how plant cells integrate multiple biases to orient their cortical arrays, offering new insights into the biophysical mechanisms underlying cell shape and growth.

## OPEN ACCESS

**Citation:** Saltini M, Deinum EE (2025)Microtubule-based nucleation results in a large sensitivity to cell geometry of the plant cortical array. *PLoS Comput Biol* 21(9): e1013282.<https://doi.org/10.1371/journal.pcbi.1013282>**Editor:** Christophe Godin, INRIA, Montpellier, FRANCE**Received:** January 13, 2025**Accepted:** June 28, 2025**Published:** September 8, 2025**Copyright:** © 2025 Saltini, Deinum. This is an open access article distributed under the terms of the [Creative Commons Attribution License](https://creativecommons.org/licenses/by/4.0/), which permits unrestricted use, distribution, and reproduction in any medium, provided the original author and source are credited.**Data availability statement:** The latest version of CorticalSim can be downloaded from<https://github.com/corticalsim/corticalsim>. DOI to the current version:<https://doi.org/10.5281/zenodo.16282498>.**Funding:** M.S. was supported by a Research Grant from Human Frontiers Science Program HFSP (Ref.-No: RGP0036/2021) to E.E.D. The funders had no role in study design, data collection and analysis, decision to publish, or preparation of the manuscript.**Competing interests:** The authors have declared that no competing interests exist.

## Author summary

Every plant cell is wrapped by a cell wall that determines its shape and growth, and through that, of the whole plant. The properties of this wall are guided by cortical microtubules. These filamentous molecules can organise themselves into parallel arrays and other structures. Computer simulations have always played an important role in understanding the behaviour of cortical microtubules. Thus far, however, they did not, or not properly, take into account that most new microtubules are nucleated (“born”) directly

from the body of an existing one and with a direction correlated to the parent. Conceptually, this would allow microtubules to exchange information over longer distance and time. Here, we study the effects of this nucleation process, and find it has major impact: both on how fast the microtubules self-organise, and on which orientations they adopt on the cell. On cylinders of realistic dimensions, we found a strong preference for the transverse orientation, even when local directional cues would favour a longitudinal orientation. Our work offers both a practical tool for modelling cortical arrays and new insight into how plant cells integrate competing local and global signals to establish the orientation underlying their shape and growth.

## Introduction

Plants take their shape through coordinated processes of cell division, expansion and differentiation. At the cellular level, many of these processes are shaped by the plant cortical microtubule array [1–3]. This dynamic structure of membrane-associated microtubules guides the anisotropic deposition of cellulose microfibrils, the main load bearing component of the cell wall, and predicts the future cell division site [4–7]. Under the right conditions [8,9], these dynamic microtubules can self-organise into a highly aligned array. This self-organisation depends on frequent collisional interactions among microtubules, resulting in angle-dependent outcomes [10]. The occurrence of such collisional interactions is controlled by the dynamics of individual microtubules which, hence, play a crucial role in the self-organisation of the array [8,11]. Microtubule nucleation, which predominantly occurs from exiting microtubules (Fig 1A; [12,13]), has a profound impact on the self-organisation of the cortical microtubule array and its ability to adopt complex patterns [13–18]. The degree of co-alignment between new and parent microtubules is an important factor in explaining these effects (Fig 1A) [17,18]. Consequently, any quantitative predictions from computer simulations critically depend on a sufficiently realistic implementation of microtubule nucleation.

This is particularly relevant in the ongoing debate about what controls the orientation of the cortical microtubule array (Fig 1B), which is the focus of this manuscript. Array orientation is significantly influenced by a combination of global and local cues. In this manuscript, we consider *global cues* as cues that require information processing throughout the whole cell to respond to them, while *local cues* can be responded to with only local information. For example, global cues such as the cell geometry as a whole can favour array orientation along the shortest closed circumferences of the cell [19,20]. Local cues, including the alignment of microtubules with mechanical stresses [21], could select for a specific orientation among these, or potentially even override the global cues [22,23]. Given that new microtubules in plants typically nucleate in directions strongly correlated with the orientation of their parent microtubule [12,17,18], how microtubules are nucleated in simulations of the cortical array is crucial. Indeed, different nucleation modes result in different sensitivities to local and global cues [14,15,24,25]. It is hypothesised that the basis of this different behaviour is that microtubule-based nucleation increases bundle lifetime and, thereby, longer maintains the information stored in the constituent microtubules [17,24]. Therefore, the ability to realistically simulate microtubule nucleation is critical for any computational study that involves a competition between local and global cues affecting alignment and orientation.

Explicit stochastic simulations (Fig 1C–1E) have a long tradition in the study of cortical array behaviour (e.g., see [9,24] for reviews). Despite the importance of microtubule-based nucleation, however, most computational and theoretical research on microtubule arrays has traditionally employed isotropic nucleation, where microtubules are initiated at

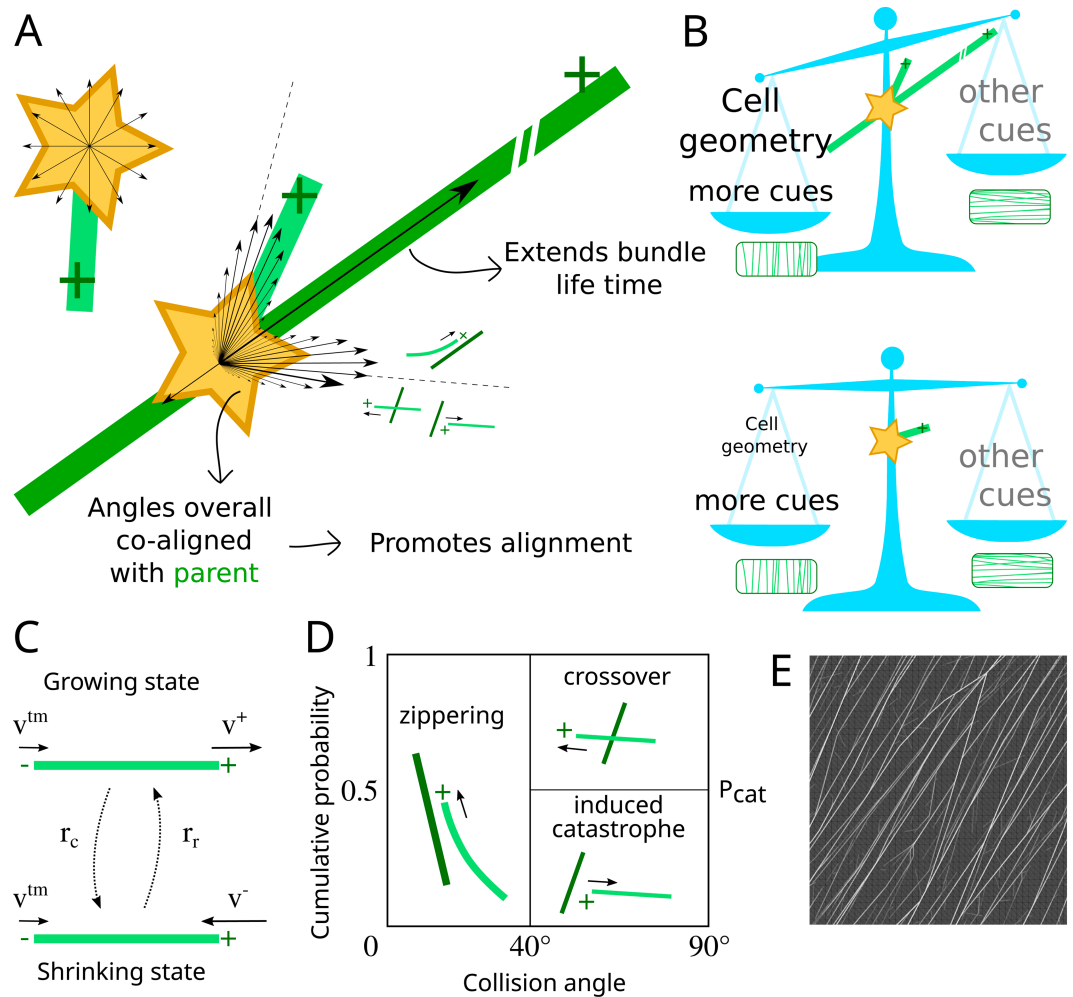

**Fig 1. Different nucleation modes (and their hypothetical impact).** (A) Unbound nucleation (i.e., nucleation occurring from a nucleation complex dispersed in the cytoplasm) typically has a uniformly distributed orientation, whereas microtubule-based nucleation follows a specific distribution relative to the parent microtubule, with parallel, antiparallel and “branched” components. The part parallel to the parent microtubule (31% in our simulations [17]) can increase the lifetime of a microtubule bundle. Additionally, the distribution of nucleation angles is overall co-aligned with the parent microtubule, which increases the parameter regime of spontaneous microtubule alignment. Dashed lines indicate the range of zippering onto microtubules with the same orientation as the parent ( $\pm 40^\circ$ ). The arrow with the large arrowhead (one side only) indicates a  $45^\circ$  angle, i.e., neutral with respect to co-alignment with the parent. More co-aligned nucleation angles increase the aligned regime (with GDD nucleation) [17]. (B) Working hypothesis: as a consequence of the properties of microtubule-based nucleation, the persistence of bundles increases, which allows for longer retention and further communication of the information about the array stored in that bundle. This renders the array as a whole more sensitive to global cues like the size and shape (geometry) of the cell. The impact of different cues varies, as visualized by variation in font size. (C-E) **Overview of model dynamics.** (C) Dynamics of individual microtubules. The plus-end (+) stochastically switches between the growing and shrinking state, whereas the minus-end (-) shows steady retraction. (D) Angle dependent collision outcomes. (E) Fragment of an example simulated array. Individual microtubules are drawn with a degree of transparency, so thicker bundles appear as stronger white lines.

<https://doi.org/10.1371/journal.pcbi.1013282.g001>

random positions with random orientations. While helpful for understanding the effects of microtubule collisions [8,10,26] and geometrical constraints on alignment [19,22,27–29], this approach ignores the fact that microtubules often nucleate from existing ones [12,13,30,31]. Many simulation studies with microtubule-based nucleation [15,17,32,33], however,

suffer from a so-called “inhomogeneity problem” [14]. In essence, this is a problem arising from a naive implementation of microtubule-based nucleation, i.e., when the local share of microtubule-based nucleation is *linearly* dependent on the local density. This linear density-dependence causes an unrestricted positive feedback on local microtubule density, leading to overly dense regions and very sparse areas in between. As cellulose synthase complexes are preferentially inserted near microtubules [6], such inhomogeneities would lead to structural weaknesses in the cell wall. While this feedback loop originates from the biological reality of microtubule-based nucleation, the naive implementation has no ingredient counteracting the positive feedback. In reality, however, the local nucleation rate saturates with density, thereby ensuring homogeneity [14].

Jacobs et al. [14] introduced a nucleation mechanism that naturally creates this saturating local density-dependence by explicitly considering appearance and diffusion of nucleation complexes at the membrane. Applied to spatially distributed but non-interacting microtubules, this mechanism resulted in homogeneous arrays. (“CorticalSimple” [34], the software employed by Jacobs et al. [14], gives all microtubules an exactly transverse orientation, so there are no collisional interactions.) In those simulations, however, nucleation complex diffusion takes up a large fraction of the computational time, even though nucleation itself is a relatively rare event. The diffusion of explicit nucleation complexes is also employed in CytoSim (e.g., [35]), which allows for microtubule-microtubule interactions, but is overall computationally heavy. The event-based platform CorticalSim [11], in contrast, has been developed for high speed, which allows for accurate computation of ensemble statistics from many simulations combined with exploration of parameter space in relatively short time [5,11,15,17,19,36], exactly what is needed for the quantitative investigation of competing cues. Until now, however, this and all other relatively fast platforms lacked a nucleation algorithm along the lines of Jacobs et al. [14] (One exception: our own application of the nucleation algorithm described and investigated here to the specific context of xylem patterning [25], which was published faster.)

Here, we bring the possibility of local density-dependent nucleation (LDD) to the context of interacting cortical microtubules: we describe a new algorithm in CorticalSim that efficiently approximates the diffusion of nucleation complexes. This algorithm overcomes the long-standing issue of inhomogeneity at limited computational cost. We compare arrays produced by LDD nucleation mode with those generated by global density-dependent microtubule-based nucleation (GDD), and isotropic nucleation (ISO). For nucleation, “local” means that the local nucleation rate and the probability that a specific spot attracts a particular nucleation event are fully determined by the density and array structure in a small area (in our case, a circle with a few  $\mu\text{m}$  radius). “Global” means that every unit of length of any microtubule competes with equal weight for a particular nucleation event, whether it is in a thick bundle or alone. We show that cell geometry has a much stronger impact on array orientation than previously thought. More generally, our results show that different nucleation mechanisms have major impact on the responsiveness of the array to cues of different types.

## 1. Results

### 1.1. Microtubule-based nucleation supports homogeneous arrays

The hypothesis that microtubule-based nucleation improves alignment of the cortical array through extending bundle lifetime [17] is critical to understanding the impact of this type of nucleation. Previously published results including microtubule-based nucleation, however, all depended on a mechanism that introduces a global competition for nucleation (global

density-dependence (GDD) in our study), so it cannot be ruled out that some of the observed behaviour was caused by the inhomogeneity problem rather than microtubule-based nucleation *per se*. We first verified that our algorithm for local density dependence (LDD) produces homogeneous arrays on both planar and capped cylindrical surfaces. Fig 2 shows that LDD indeed produced homogeneous arrays with default parameters (Table 1), comparable to isotropic nucleation (ISO), whereas GDD resulted in large inhomogeneities, visible as a combination of both large, nearly empty areas and a few very dense bundles. With LDD and ISO, inhomogeneities in the early array disappeared over time, whereas with GDD, array inhomogeneity increased with time (Fig 2A–2E). We further quantified the development of inhomogeneity by following the local density over time in transversely oriented arrays on cylinders (Fig 2F). Total density and its local variations were similar with ISO and LDD. With GDD, however, all density tended to accumulate in a single transverse band. Once established, such bands were extremely stable and reached unrealistically high densities (saturating at values over  $120 \mu\text{m}^{-1}$ , which is equivalent to 3 layers of microtubules, touching side by side, on top of each other). The local density profiles with LDD and ISO, moreover, were more dynamic than with GDD. Such fluctuations in microtubule locations could further support homogeneous cell wall properties (see also [14]).

## 1.2. Microtubule-based nucleation stimulates array alignment

Although with LDD the visual appearance was rather similar to arrays produced with isotropic nucleation, LDD microtubule-based nucleation increased the parameter regime for spontaneous alignment almost as much as the GDD algorithm (Fig 3A). In this figure, the parameters describing the dynamic instability of individual microtubules and the nucleation rate are collapsed onto a single number  $G$ , defined in Eq (10) [8,17,37]. This so-called control parameter is the (negative) ratio of two length scales: an interaction length scale and the average microtubule length without interactions. As  $G$  increases towards zero, the average number of interactions per microtubule lifetime increases. With sufficient interactions, spontaneous alignment occurs (order parameter  $S_2$  on the vertical axis increases from near zero to near one. See Eq (6) for a definition of  $S_2$ ). With this understanding of the process [8,9,20,24], the result in Fig 3A can be restated as follows: microtubule-based nucleation decreases the minimal number of interactions per average microtubule lifetime that is required for spontaneous alignment (other parameters remaining constant). Note that in the LDD case,  $G$  is a measured quantity that depends on the actual frequency of nucleation events (Eq (11)), which is inherently stochastic. However, as shown in S1 FigB, the error bars of the measured  $G$  were small, as expected from the slow scaling of  $G$  with  $r_n$  ( $G \sim \sqrt[3]{1/r_n}$ ).

Alignment also occurred faster with microtubule-based than with isotropic nucleation, when comparing parameters at similar points in the  $S_2(G)$ -curve (Fig 3B). However, LDD took somewhat longer to align than GDD. We expected that the difference between LDD and GDD mostly resulted from the improved realism of the LDD algorithm: LDD incorporates the experimental observation that nucleation complexes nucleate with higher rate when they are attached to microtubules [13,14], whereas GDD uses the same rate for bound and unbound complexes. Consequently, the initial nucleation rate is reduced with LDD, but not with the other algorithms. We, therefore, also computed the curves with reduced unbound nucleation rate for GDD and with equal rates for bound and unbound complexes in LDD. Interestingly, the reduction of the unbound rate led to a larger aligned regime for both LDD and GDD (S2 FigA and S2 FigB). Also with both LDD and GDD, the “noise level” of  $S_2$  in the disordered regime increased with unequal rates. With LDD, alignment also occurred slower with equal rates than with reduced unbound rate (S2 FigC). In retrospect, an explanation for

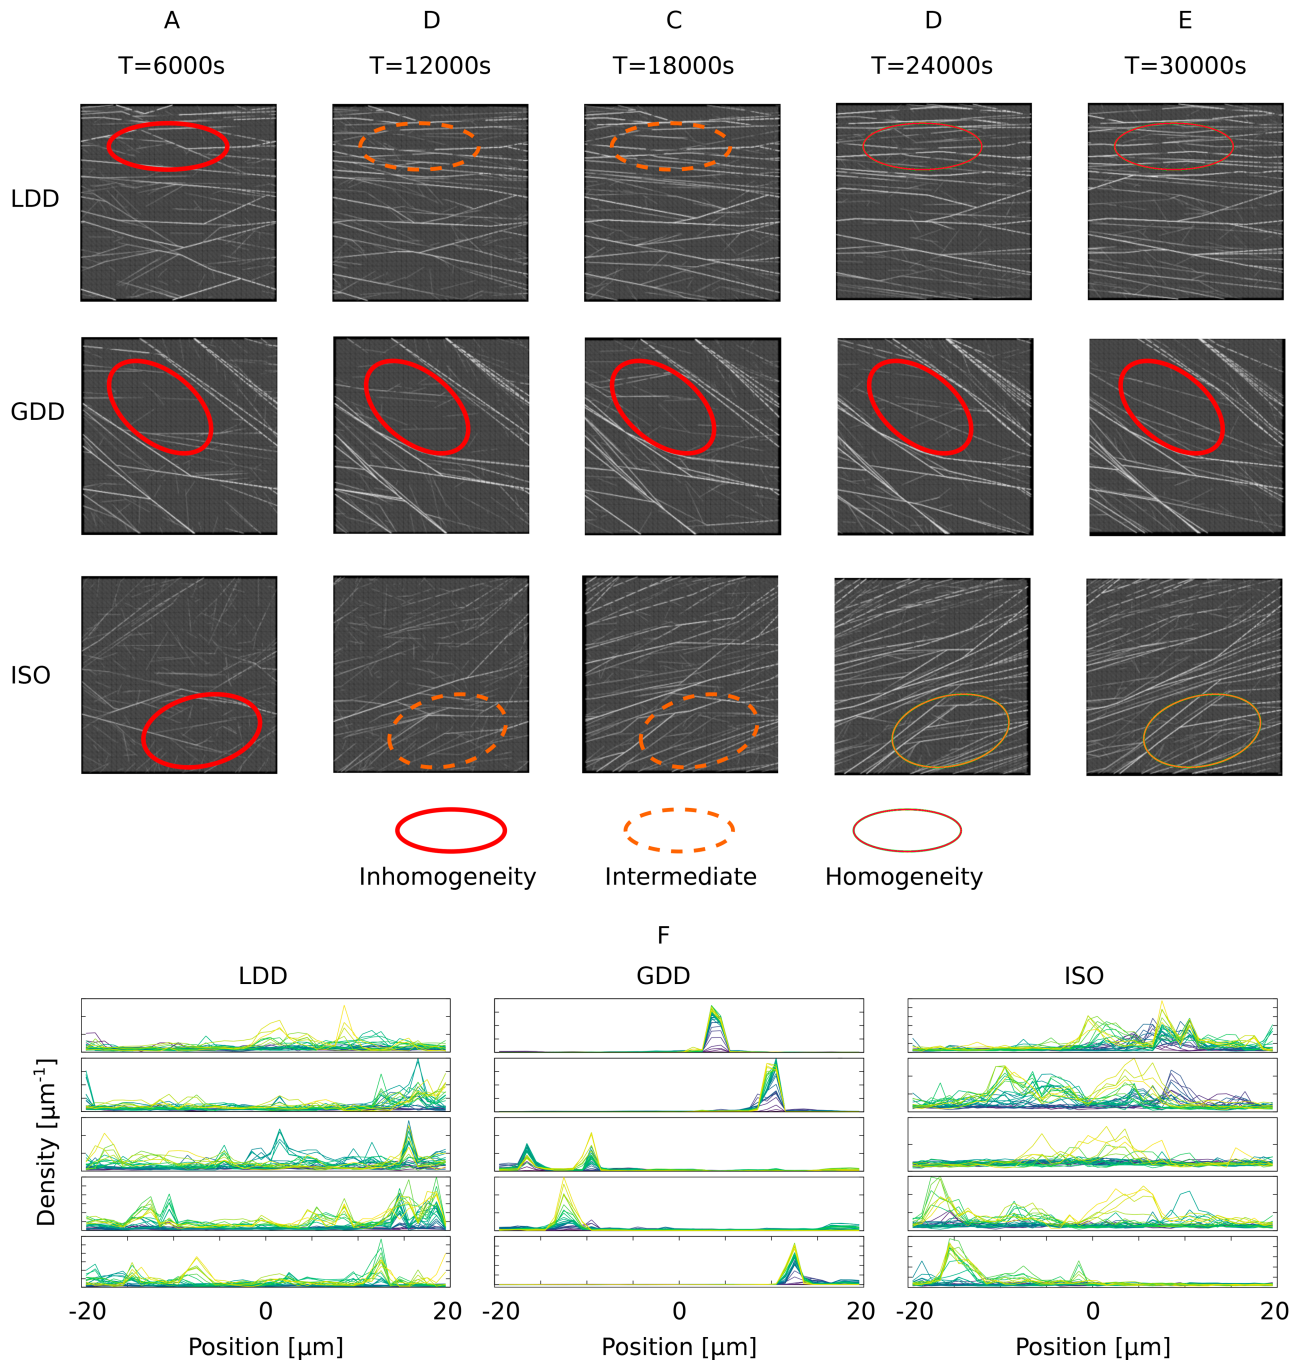

**Fig 2. Simulation snapshots show that the new LDD microtubule-based nucleation yields much more homogeneous arrays than GDD microtubule-based nucleation.** (A-E) Simulation snapshots of a  $40 \times 40 \mu\text{m}^2$  square domain taken every 6000 s (100 min). Red thick ovals represent areas of inhomogeneity, orange dashed ovals intermediate areas, and green thin ovals areas where the array became homogeneous. Note the persistence of areas of inhomogeneity in the GDD case, compared to the transient inhomogeneity in the LDD and ISO cases. (F) Local density along the axis of a cylinder ( $L = 40 \mu\text{m}$ ;  $R = 6 \mu\text{m}$ ) in bins of  $1 \mu\text{m}$  for tightly transversely oriented arrays. Five independent simulations per nucleation mode. Time increases from purple (start of simulation) to yellow (end). In these simulations, catastrophe rate values correspond to data points marked with large symbols in Fig 3, i.e., (LDD)  $r_c = 0.00275 \text{ s}^{-1}$ , (GDD)  $r_c = 0.003 \text{ s}^{-1}$ , (ISO)  $r_c = 0.002 \text{ s}^{-1}$ . Density values are omitted from the axes for readability. Tic marks on the vertical axis represent density increments of  $3 \mu\text{m}^{-1}$  for LDD and ISO and  $40 \mu\text{m}^{-1}$  for GDD. All axes start at 0. Transverse arrays were randomly selected from a larger set of simulations with the sole criterion that the array orientation angle on the cylinder mantle  $|\Theta_{S_2}| \in [0.49\pi, 0.51\pi]$  ( $[88.2^\circ, 91.8^\circ]$ ).

<https://doi.org/10.1371/journal.pcbi.1013282.g002>

**Table 1. Default model parameters.**

| Parameter             | Description                                                              | Value      | Unit                             | Source  |
|-----------------------|--------------------------------------------------------------------------|------------|----------------------------------|---------|
| $v^+$                 | Growth speed                                                             | 0.05       | $\mu\text{m s}^{-1}$             | [15]    |
| $v^-$                 | Shrinkage speed                                                          | 0.08       | $\mu\text{m s}^{-1}$             | [15]    |
| $v^{\text{tm}}$       | Treadmilling speed                                                       | 0.01       | $\mu\text{m s}^{-1}$             | [17,63] |
| $r_c$                 | Catastrophe rate                                                         | variable   | $\text{s}^{-1}$                  |         |
| $r_r$                 | Rescue rate                                                              | 0.001      | $\text{s}^{-1}$                  | [15]    |
| $\theta_c$            | Maximum collisional angle for bundling                                   | $40^\circ$ | -                                | [10]    |
| $P_{\text{cat}}$      | Fraction of induced catastrophe after collision when $\theta > \theta_c$ | 0.5        | -                                | [11,36] |
| $r_n$                 | Nucleation rate for ISO and GDD                                          | 0.001      | $\mu\text{m}^{-2} \text{s}^{-1}$ | [15]    |
| $r_{\text{ins}}$      | Complex appearance rate for LDD                                          | 0.0045     | $\mu\text{m}^{-2} \text{s}^{-1}$ | [14]    |
| $r'_{\text{ins}}$     | rescaled:                                                                | 0.00108    | $\mu\text{m}^{-2} \text{s}^{-1}$ |         |
| $r_u$                 | Per-complex unbound nucleation rate                                      | 0.002      | $\text{s}^{-1}$                  | [14]    |
| $D$                   | Diffusion coefficient of nucleation complexes                            | 0.013      | $\mu\text{m}^2 \text{s}^{-1}$    | [14]    |
| $N$                   | Number of meta-trajectories for LDD                                      | 6          | -                                |         |
| $R$                   | Maximum meta-trajectory length for LDD                                   | 1.5        | $\mu\text{m}$                    |         |
| $P_{\text{rej},b}$    | Rejection probability for microtubule-based nucleation for LDD           | 0.76       | -                                | [13,14] |
| $P'_{\text{rej},b}$   | rescaled:                                                                | 0          | -                                |         |
| $P_{\text{rej},u}$    | Rejection probability for unbound nucleation for LDD                     | 0.98       | -                                | [14]    |
| $P'_{\text{rej},u}$   | rescaled:                                                                | 0.91667    | -                                |         |
| $\rho_{1/2}$          | Tubulin density at which half of nucleations are isotropic for GDD       | 0.1        | $\mu\text{m}^{-1}$               | [17]    |
| $f_{\text{forward}}$  | Nucleation probability along the parent for GDD and LDD                  | 0.31       | -                                | [17]    |
| $f_{\text{backward}}$ | Nucleation probability anti-parallel to the parent for GDD and LDD       | 0.07       | -                                | [17]    |
| $f_{\text{left}}$     | Nucleation probability to the left of the parent for GDD and LDD         | 0.31       | -                                | [17]    |
| $f_{\text{right}}$    | Nucleation probability to the right of the parent for GDD and LDD        | 0.31       | -                                | [17]    |
| $\epsilon$            | Ellipse eccentricity for GDD and LDD                                     | 0.89       | -                                | [12,17] |
| $\theta_b$            | Mean branching angle for GDD and LDD                                     | $35^\circ$ | -                                | [12,17] |

<https://doi.org/10.1371/journal.pcbi.1013282.t001>

this is that, with equal rates, there is more isotropic nucleation and, therefore, the behaviour is more similar to isotropic. With GDD, the density often increased so rapidly (e.g., see Fig 2F), that the fraction of isotropic nucleation had little impact on the time course. So, microtubule-based nucleation speeds up alignment even when the initial nucleation rate is reduced (and see [14,38]).

Together, these results validate the conclusion that microtubule-based nucleation promotes alignment. Note that this will still depend on the distribution of nucleation angles relative to the parent microtubule (see [17,18]), which is experimentally observed to be (moderately) co-aligned with the parent microtubule [12,13].

### 1.3. Microtubule-based nucleation increases sensitivity to geometrical cues

It is hypothesized that microtubule-based nucleation can increase microtubule bundle lifetime [17,24], and, consequently, the information about the array stored in the bundle can be maintained longer. Microtubule-based nucleation could moreover facilitate increased bundle length, which allows information to propagate further through the array. Both processes could change the sensitivity of the array to geometric cues and shift the balance between different types of cues (Fig 1B). This would have major implications for the ongoing debate on

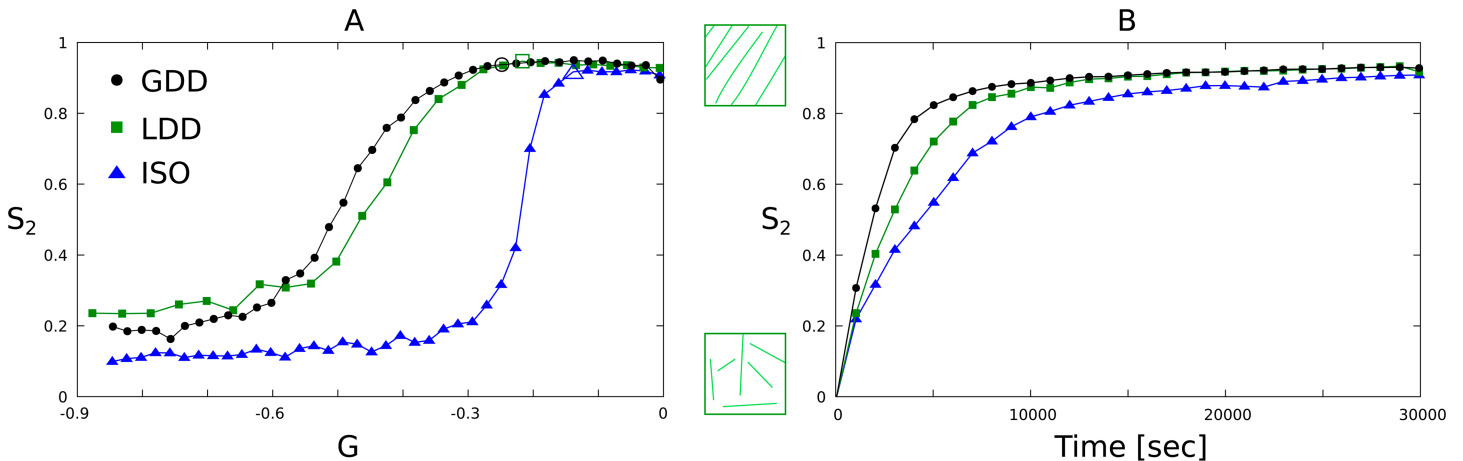

**Fig 3. LDD nucleation maintains the alignment promoting effect of microtubule-based nucleation** as previously reported for GDD. Aligned regime for LDD, GDD, and ISO nucleation modes on a  $40 \times 40 \mu\text{m}^2$  square periodic geometry. (A) Median over 100 independent simulation runs of the order parameter  $S_2$  as function of the control parameter  $G$  at  $T = 3 \times 10^4$  s (8 h, 20 min). Data points marked as larger, empty circle, square, or triangle correspond to the parameter values used for panel (B). (B) Median over 100 independent simulation runs of the order parameter  $S_2$  as a function of the simulation time for selected values of  $G$  (data points marked with large symbols in panel (A)) in the aligned regime. Error bars of (A) can be found in S1 Fig.

<https://doi.org/10.1371/journal.pcbi.1013282.g003>

what determines the orientation of the cortical array [5,24,28,39,40]. We, therefore, investigated the preferred orientation of simulated arrays with the three nucleation modes on cylindrical cells of the same aspect ratio but different size. We studied the case of cylinders with  $40 \mu\text{m}$  length and  $12 \mu\text{m}$  diameter, and  $60 \mu\text{m}$  length and  $18 \mu\text{m}$  diameter, which is in the realistic range for epidermal cells of the root and hypocotyl of *Arabidopsis thaliana*. Fig 4 shows that with LDD and ISO, the cylindrical geometry favoured a transverse orientation over a longitudinal one. A high degree of alignment was obtained faster for transverse than for longitudinal arrays (Fig 5). Both effects were stronger for LDD than for ISO.

GDD, however, behaved differently, at first sight appearing almost indifferent about transverse/longitudinal. As we discuss later, however, the situation is more complicated, and GDD can also be the most sensitive to particular geometrical features.

To put the impact of cell geometry in perspective, we ran additional simulations with additional cues that either reinforce or compete with the effect of geometry alone (Fig 4A, 4B). Overall, LDD increased the sensitivity to the global geometry cue compared to ISO. On the larger cells (Fig 4B), the additional cues resulted in more variation per nucleation mode, reflecting the reduced impact of the global cell geometry cue. Similarly, the impact of a higher catastrophe rate at the cylinder caps (“global bias”: an 8% increase of  $r_c$  at the caps) was weaker on the larger cells. In contrast, the impact of local cues (“local bias”, an 8% increase of rescue rate  $r_r$  in the indicated direction), was stronger on the larger cells. As an 8% increase in  $r_r$  for the local bias only resulted in a 2% increase in  $G$ , we varied the strength of the local bias over a larger range (Figs 4C, 4D, S3 Fig). In particular, even with isotropic nucleation, the largest bias tested towards longitudinal still resulted in a small majority of transverse arrays on the small cylinders (maximum 24% increase of  $r_r$ , corresponding to a 6% increase of  $G$  for perfectly longitudinal microtubules).

The different biases, and particularly the “global bias”, had very little effect on array orientation with GDD, suggesting that, with GDD, the array becomes committed towards a particular orientation even before all information is fully integrated (S3 Fig). Time traces of individual simulations on cylinders support this hypothesis. Fig 5, indeed, shows that, in most cases,

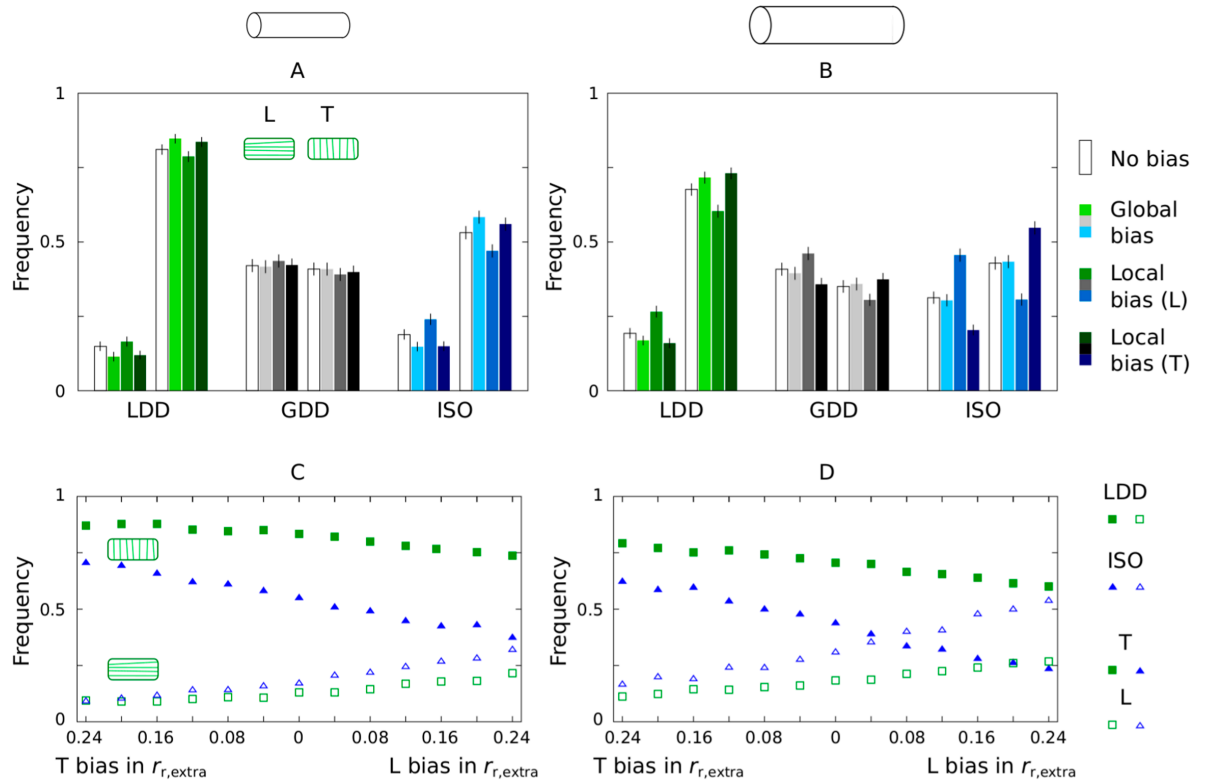

**Fig 4. LDD microtubule-based nucleation increases the sensitivity of array orientation to cell geometry.** Fraction of aligned arrays at  $T = 3 \times 10^4$  s (8 h, 20 min) with a transverse (T, histograms to the right or filled symbols; when  $|\Theta_2| < 10^\circ$ ), or longitudinal (L, histograms to the left or empty symbols; when  $|\Theta_2| > 80^\circ$ ) orientation out of  $n = 2000$  independent runs each, with or without directional biases: (A,B) 8% increase in catastrophe rate at the cylinder caps for the global bias; and 8% increase in maximum rescue rate on the cylinder mantle according to Eq (12) for the local bias, and (C,D) for different values of the local bias in  $r_{r,extra}$  according to Eq (12); (C,D): in the left half of each panel, the local bias is implemented in the transverse direction, in the right half in the longitudinal direction. Note that, with these parameters, a bias of 0.04 in  $r_{r,extra}$  corresponds to a change of 0.01 in  $G$  in the same direction. The simulation domain is a cylinder of (A,C) 40  $\mu\text{m}$  length and 12  $\mu\text{m}$  diameter, and (B,D) 60  $\mu\text{m}$  length and 18  $\mu\text{m}$  diameter. (A,B) Error bars represent 95% confidence interval according to a binomial model (computed using the `binom.test` function in R statistical package version 3.6.3). (C,D) Error bars have been omitted because they are approximately the same size as the symbols. In these simulations,  $r_c = 0.00225 \text{ s}^{-1}$ .

<https://doi.org/10.1371/journal.pcbi.1013282.g004>

$R_2$  increased substantially after the a stable orientation was obtained (near horizontal part of the traces). At the times of rapid reorientation, on the other hand,  $R_2$  was relatively low. With both LDD microtubule-based and isotropic nucleation, the array orientation appeared more stable for transverse arrays than for longitudinal arrays, whereas for GDD, the stability looked more similar. Additionally, very few traces crossed the middle with GDD, whereas a full reorientation from longitudinal to transverse occurred in a substantial fraction of the runs with LDD and ISO.

One possible signature of less efficient whole cell information processing on larger geometries is the formation of local domains with competing orientations (see Fig 6 for some examples). To quantify how sensitive the different nucleation algorithms are to this, we compared simulations on square periodic domains of different sizes. With all three nucleation mechanisms, we found a reduction of the plateau  $S_2$  level of the aligned regime in  $(G, S_2)$ -curves with increasing domain size (S4 Fig). The plateau level was also lower for the elongated  $20 \times 80 \mu\text{m}^2$  than for the same surface area  $40 \times 40 \mu\text{m}^2$  domains, corroborating the idea that

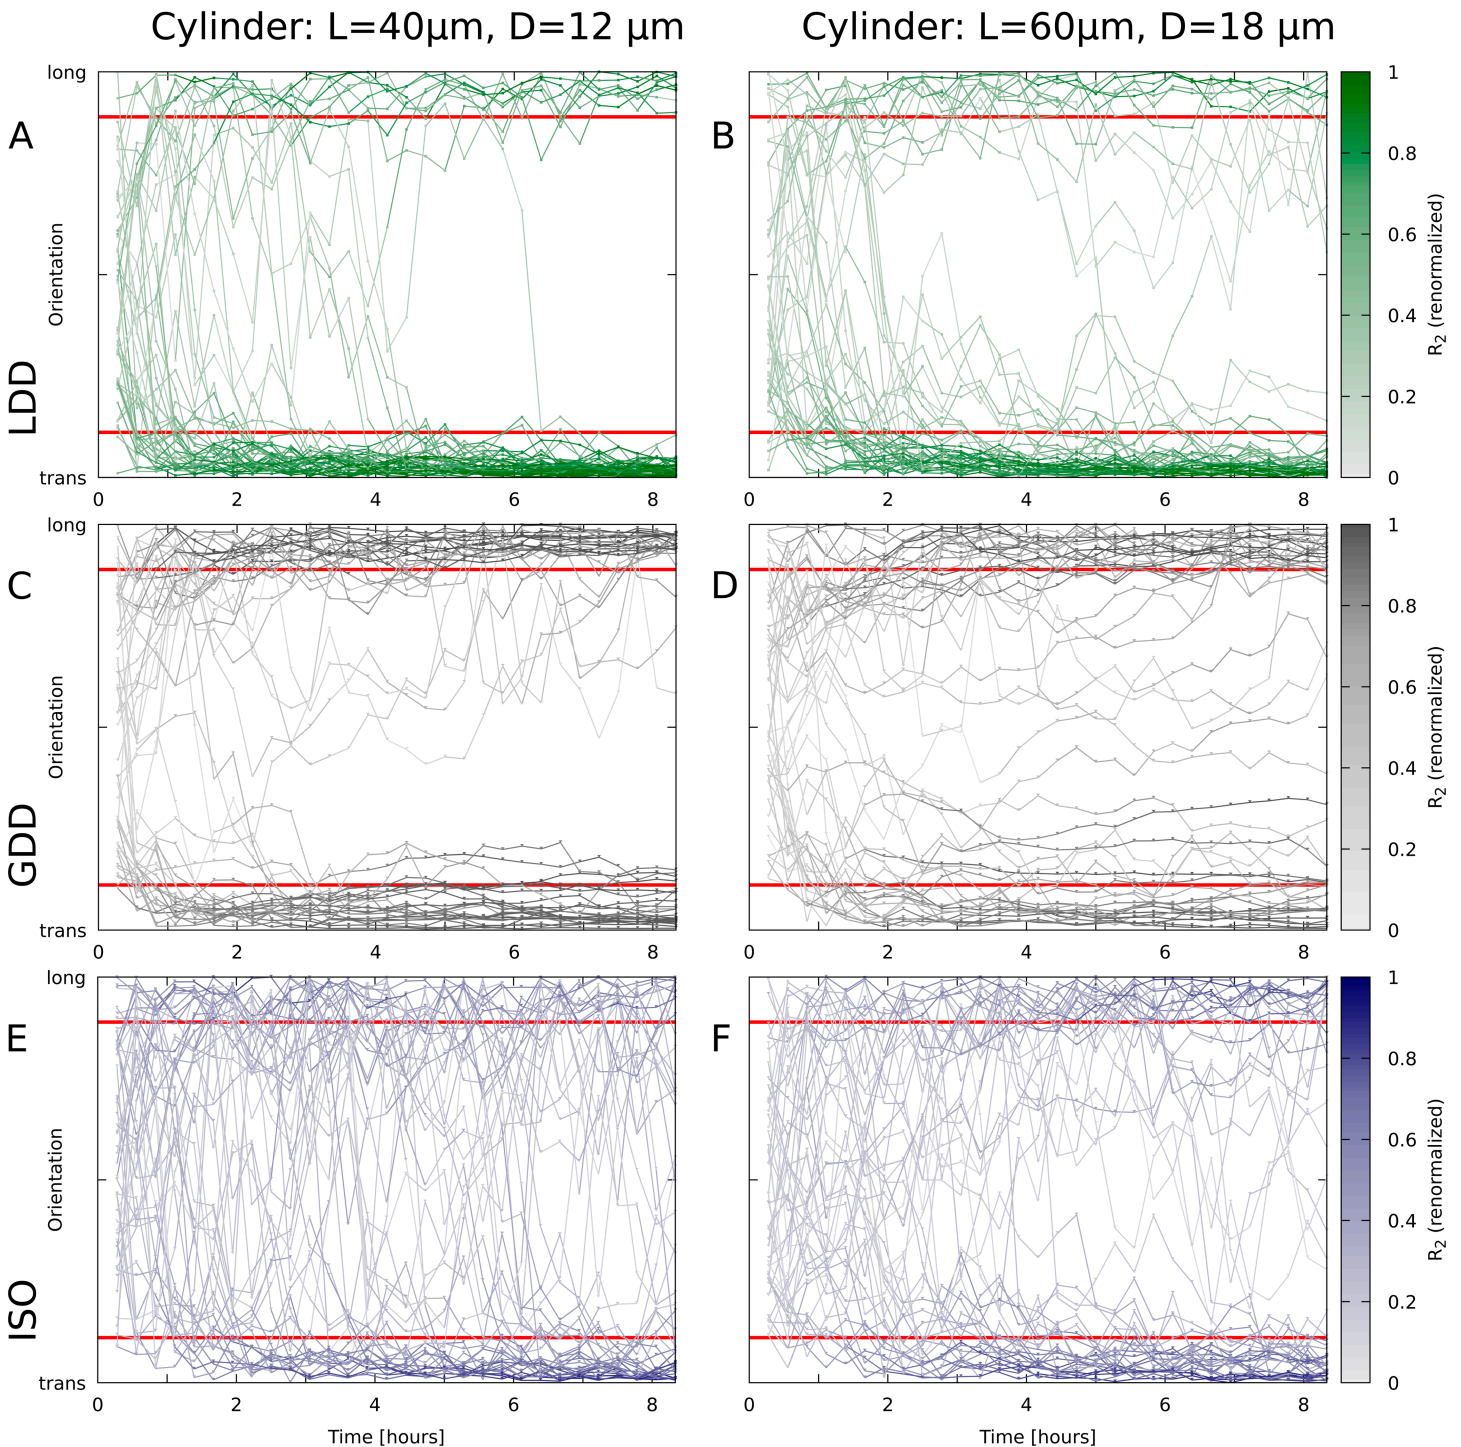

**Fig 5. Orientation over time for individual simulations.** Lines depict the orientation of the array ( $\Theta$  based on  $R_2$ ) for  $n = 50$  simulations per nucleation mode / cylinder size. Lines are coloured by the degree of alignment, renormalized  $R_2 = R_2/R_2(\max|\Theta)$ . Red lines indicate the boundaries of the “transverse” (trans) and “longitudinal” (long) categories in Fig 4. Microtubule dynamic parameters were the same everywhere in the domain, regardless of orientation. Nucleation modes: (A,B) LDD; (C,D) GDD; (E,F) ISO. Cylinder sizes: length  $40 \mu\text{m}$ , diameter  $12 \mu\text{m}$  (A,C,E); length  $60 \mu\text{m}$ , diameter  $18 \mu\text{m}$  (B,D,F).

<https://doi.org/10.1371/journal.pcbi.1013282.g005>

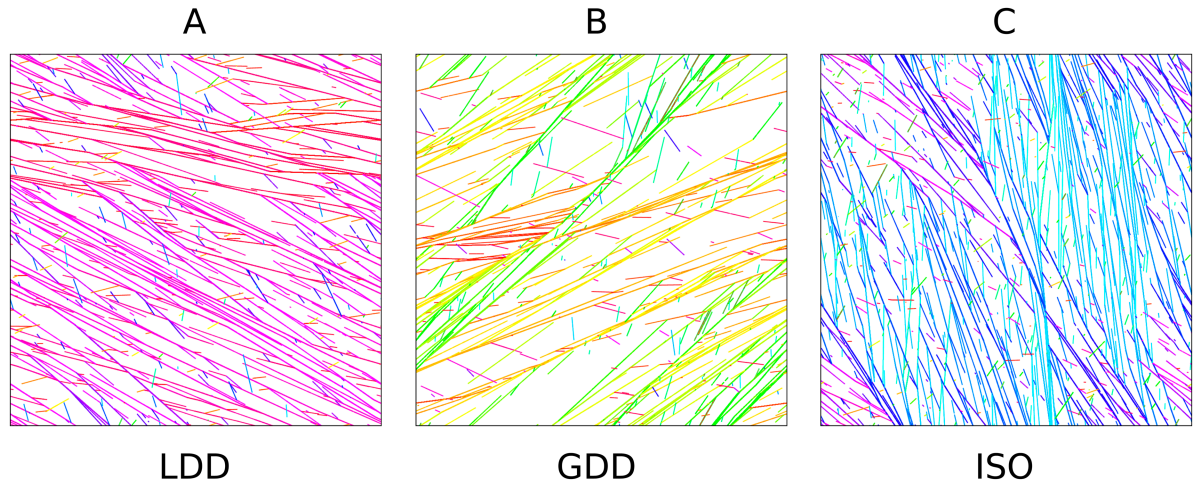

**Fig 6. Local domain formation is much less pronounced in arrays obtained through LDD than through GDD and ISO nucleation modes.** Snapshot at  $T = 3 \times 10^4$  s (8 h, 20 min) of the microtubule array in a periodic square simulation domain of  $80 \times 80 \mu\text{m}^2$  for (A) LDD:  $S_2 = 0.90$ ,  $G = -0.19$ , (B) GDD:  $S_2 = 0.90$ ,  $G = -0.19$ , and (C) ISO:  $S_2 = 0.84$ ,  $G = -0.14$ . Different colours corresponds to different orientations for a microtubule or a bundle: warm colours correspond to transverse and cool colours to longitudinal orientations.

<https://doi.org/10.1371/journal.pcbi.1013282.g006>

this is the result from local domain formation (S4 Fig). With isotropic nucleation, the reduction was most pronounced, particularly on the largest ( $80 \times 80 \mu\text{m}^2$ ) periodic squares. Plotting the same simulations as ( $S_2$ , density) scatter plots (Fig 7) shows that local domain formation occurred most often and most extreme with isotropic nucleation, with some points with high density and high  $G$  (i.e., well inside the aligned regime) having (global)  $S_2$  values typical of disordered arrays. While these results offer a good explanation for the relative differences between LDD and ISO, they do not explain the insensitivity of GDD.

**1.3.1. Cylinders and boxes have distinct impact on array orientation.** To test whether the preference for transverse arrays arose from the cylindrical shape or the aspect ratio of the geometry, we also investigated the preferred orientation on cylinders and boxes with different aspect ratios, while keeping the total surface area roughly constant (Fig 8, S5 Fig). On elongated boxes and cylinders, all three nucleation modes adopted either a transverse or a longitudinal orientation, albeit with different preferences for either. In particular, with LDD and ISO, the cylindrical geometry led to a reduced preference for the longitudinal orientation compared to equally long boxes. With GDD, this did not happen. On square boxes, also a fully diagonal orientation appeared (all modes) and, with GDD, an orientation diagonal over two opposing faces and parallel along the two connecting edges. This orientation had a lower global degree of order ( $R_2$ , see [11]) than other preferred orientations, probably the result of conflicts within the array. (Note that  $R_2$  contains a correction for the isotropic expectation, so for the flat and elongated shapes, the maximum attainable  $R_2$  value for longitudinal *versus* transverse orientation can be very different. A difference in  $R_2$  for similar orientations, however, remains meaningful.) We hypothesise that these internal conflicts have less impact when almost all array density is concentrated in a single closed band (which is expected for GDD) than with a broader, similarly oriented array and, therefore, these orientations are substantially less favourable with LDD and ISO (although they have been observed with ISO nucleation before, but with different parameters [20]). Further flattening the box led to a strong

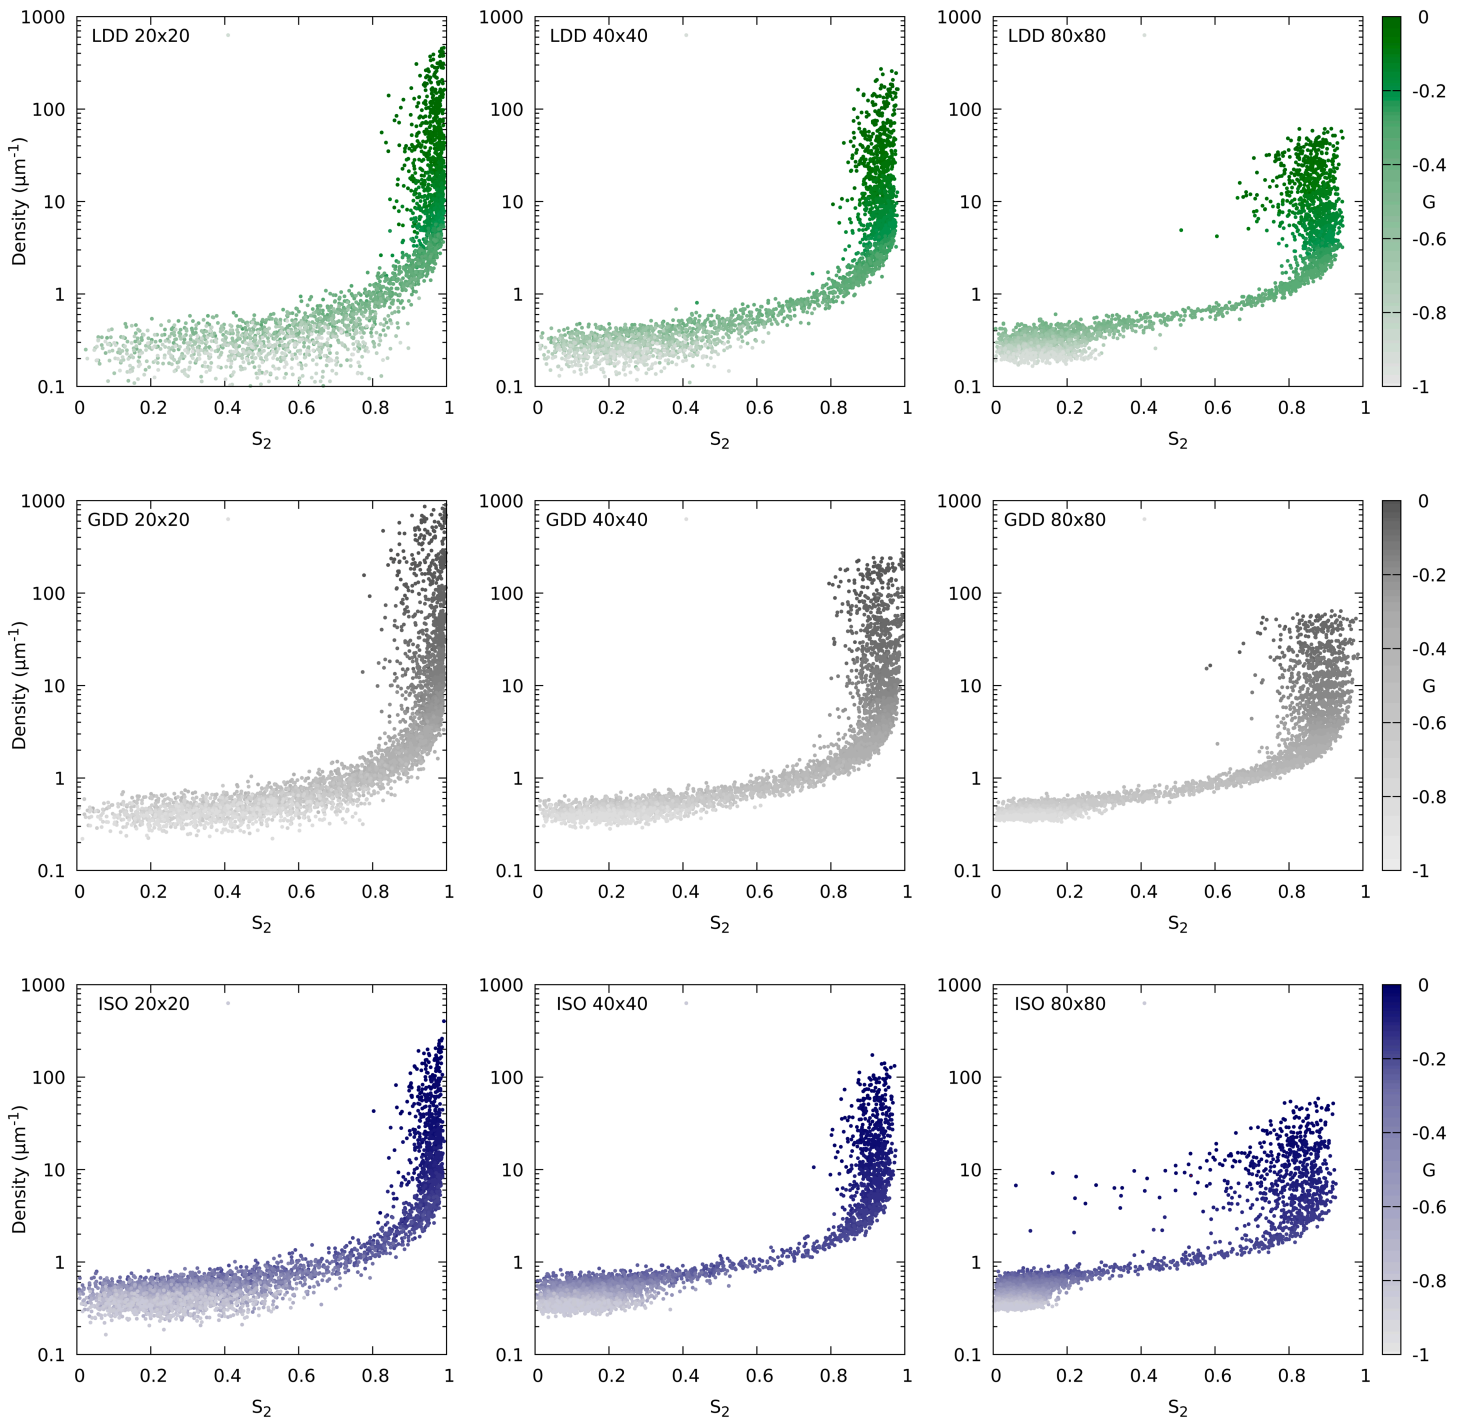

**Fig 7. Clear signs of local domain formation with isotropic nucleation on large ( $80 \times 80 \mu\text{m}^2$  periodic) simulation domains.** Scatter plots of density as a function of  $S_2$ , coloured by  $G$  for the three nucleation modes (rows: LDD, GDD, ISO) and three domain sizes (columns:  $20 \times 20$ ,  $40 \times 40$  and  $80 \times 80 \mu\text{m}^2$ ) as indicated in the graphs. Most points fall on a curve from low density and low  $S_2$  to high density and high  $S_2$  with increasing  $G$ . Points with relatively high  $G$  and density, but distinctly lower  $S_2$  than other points with similar  $G$  and density are in the regime of spontaneous alignment, but the occurrence of multiple aligned domains with different orientations reduces the global  $S_2$ . The most cases, and most severe ones, occurred with isotropic nucleation on the largest domains. These plots are based on the same data as S4 Fig, with 100 simulations per (target)  $G$  value. Simulation time:  $T = 3 \times 10^4$  s (8 h, 20 min; lower for the highest  $G$  values for LDD and GDD, because not all simulations terminated in time).

<https://doi.org/10.1371/journal.pcbi.1013282.g007>

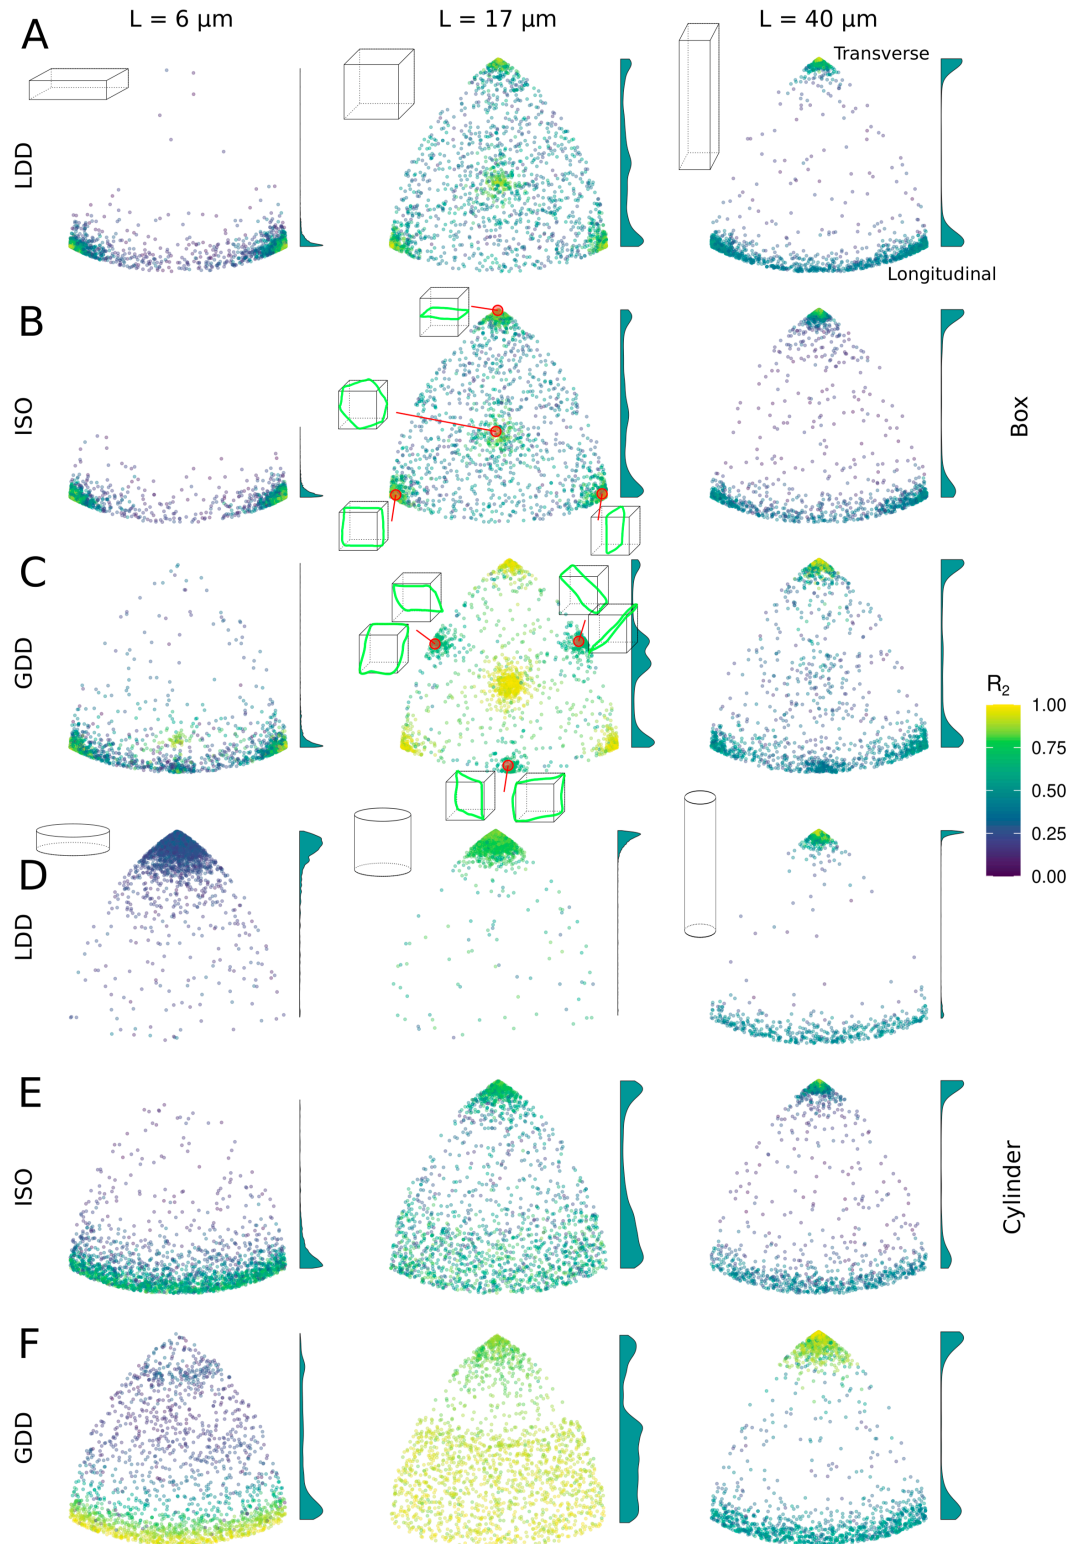

**Fig 8. Nucleation mode has a strong impact on sensitivity to geometry.** Orientation of  $n = 2000$  arrays at  $T = 3 \times 10^4$  s (8 h, 20 min) on boxes (A-C) and cylinders (D-F), all with the same total surface area. Individual points are coloured by  $R_2$  value. Note that this measure of alignment has an orientation and geometry dependent maximum value  $\leq 1$ . The basis for the surface area is a cylinder of  $L = 40 \mu\text{m}$  and diameter of  $12 \mu\text{m}$  from Fig 4A. For cylinders (D-F),  $L$  is varied as indicated, and diameter adjusted to maintain the same total surface area. This has approximately the same surface area as a  $L \times W \times W = 17 \times 17 \times 17 \mu\text{m}^3$  box. For boxes (A-C), length  $L$  is varied as indicated and width  $W$  is adjusted accordingly

to maintain the same total surface area. Cartoons are indicative of aspect ratios. Cartoons with green bands (ISO and GDD square box data) illustrate the array orientations belonging to the different positions in the plot. Histograms at the side of each plot show the relative distribution of transverse (top) to longitudinal (bottom) orientations. The highest peak in each histogram has a fixed height, i.e., the histograms are scaled differentially. In these simulations,  $r_c = 0.00175 \text{ s}^{-1}$ . For intermediate aspect ratios, see S5 Fig.

<https://doi.org/10.1371/journal.pcbi.1013282.g008>

preference for transverse orientations with all three nucleation modes, among which the orientations parallel to one face had the highest  $R_2$ . The equivalent of the two types of diagonal orientations was only visible with GDD.

Whereas the three nucleation modes showed relatively similar behaviour on boxes (Fig 8A–8C), their behaviour on cylinders was very different (Fig 8D–8F). With LDD, the transverse orientation was strongly favoured for most aspect ratios (Fig 8D, S5 Fig), albeit with increasing variation for flatter cylinders. With ISO (Fig 8E), transverse and roughly longitudinal were the most preferred orientations, and flattening the cylinder resulted in a gradual shift of preference from transverse to longitudinal. Just as increasing the nucleation rate of unbound complexes to the same level as microtubule-bound complexes made the alignment process of LDD more similar to ISO (S2 Fig), increasing the unbound rate of LDD reduced the preference for transverse on the flattest cylinders and made the distribution of orientations more similar to ISO (S6 Fig). With GDD (Fig 8F), there was a band of non-preferred oblique orientations, the width of which depended on the aspect ratio (S5 Fig). Only on the flattest cylinder, GDD produced a strong preference for a longitudinal orientation. These results show that the impact of geometry itself is substantial even with isotropic nucleation. Microtubule-based nucleation further increases and sometimes alters this impact.

**1.3.2. Homogeneous and inhomogeneous arrays are sensitive to different aspects of cell geometry.** GDD appeared almost insensitive to the cylindrical geometry, with very similar occurrences of longitudinal and transverse arrays. In contrast, on periodic (square) geometries, GDD was the only algorithm that showed a preference for certain orientations (S7 Fig). These preferred orientations corresponded to the orientations of short closed paths that wrap around the geometry. This effect was most pronounced close to the transition to order (S7 FigD–S7 FigF). Studying snapshots of individual simulations with such specific orientations showed that in these cases, there often was a single superbundle which wrapped back upon itself and, with time, absorbed most microtubule mass. With GDD, the parallel nucleations on the closed bundle increase its density, and, thereby, further increase the proportion of nucleations occurring from the closed bundle. With ISO, as well as with LDD nucleation, the additional density on the same bundle has no effect on the fraction of nucleations occurring from that bundle. So, only with GDD there is a positive feedback loop favouring closed superbundles and the corresponding array orientations.

On cylinders, the available closed paths are transverse and longitudinal. These coincide with the most adopted orientations with all nucleation modes (Figs 4 and 5). Time traces of individual simulations on cylinders (Fig 5), nonetheless, show a difference in behaviour between GDD and the other two nucleation modes. With GDD microtubule-based nucleation, the array often adopted the closed path orientation closest to the initial array orientation, with almost no traces crossing the midline ( $\pm 45^\circ$  away from transverse). For snapshots of an example simulation, see S8 FigA. With the other two nucleation modes, however, multiple arrays (from  $n = 50$ ) were observed that reoriented from longitudinal to transverse (Fig 5A, 5B, 5E, 5F; for snapshots, see S8 FigB). Again, the deviating array behaviour with GDD could be explained from the strong positive feedback on closed bundles that occurs with GDD only: once a closed bundle is formed, the probability that later on a competing

orientation is established keeps decreasing with time, because the array outside the closed bundle is slowly drained.

## Discussion

In this work, we have developed a novel, computational time-efficient nucleation algorithm for realistic microtubule-based nucleation that does not suffer from the inhomogeneity problem that haunted the field for over a decade [14,15,17,32]. We showed that different nucleation mechanisms can have great impact on the overall behaviour of the cortical array. In particular, microtubule-based nucleation with local microtubule density-dependence increased the regime of spontaneous alignment and made the array more sensitive to subtle orientational cues from the cell's geometry. Our simulations on different cell shapes and geometries demonstrate how the ability to realistically simulate microtubule-based nucleation opens up the possibility of quantitative comparison of different forces acting on array orientation.

While we believe that LDD is a much more realistic mechanism for nucleation than GDD, the formation of certain *inhomogeneous* array structures could benefit from GDD-like behaviour. For example, the preprophase band (PPB) somewhat resembles the single-banded arrays obtained with GDD (Fig 2F) [41]. To what extent would tuning between LDD-like and GDD-like nucleation be biochemically possible? From a theoretical perspective, the critical difference between the two nucleation-based algorithms that we discuss is whether the relative probability to attract a specific nucleation event to a particular small region *linearly* depends on the local microtubule density (GDD) or this probability saturates (LDD). The saturation is a natural effect of locally exploring nucleation complexes (e.g., diffusion after appearance at the membrane) and, therefore, to some extent unavoidable. The saturation may be delayed, however, by reducing the dwell time ( $\rightarrow$  smaller search area) of a nucleation complex at the membrane, or some co-factor that binds to the microtubule lattice and functions as a density sensor. Multiple factors, including Augmin, facilitate nucleation complex recruitment [31], which is observed to be biased towards microtubules [14], and local nucleation complex density increases proportionally as regular gaps start appearing in developing protoxylem [15]. Such effects make the nucleation a bit more GDD-like and indeed improve the translation of locally varying dynamic parameters to a pattern of distinct bands and gaps in simulated protoxylem arrays [14,25]. In that context, array homogeneity at the whole-cell level is maintained, because appearance of nucleation complexes occurs throughout the cell [14,25]. If the appearance of nucleation complexes would be biased towards a specific region via another patterning mechanism, this could, for example, support the formation of a “globally inhomogeneous” pattern like the PPB (see also [42]). Some experimental observations indeed support spatial variation in nucleation during PPB formation [41,43]. To what extent the parameters that describe nucleation complex dynamics are varying over time and space and may be spatially regulated (e.g., via ROP proteins) remains a topic for future investigation.

Our simulations on different geometries show that cell shape can have a huge impact on the preferred set of orientations, stressing the importance of also considering realistic cell shapes [5,19,22]. In our simulations on cylinders, reliably establishing a longitudinal orientation *de novo* seemed hard, i.e., it required stronger differences in the orientation dependent rescue rate than the maximum we tested. A plausible explanation for the strong orienting effect is that the longitudinal orientation on a cylinder causes conflicts within the

array, whereas the transverse orientation does not. Boxes have two specific longitudinal orientations without conflict, one or two of which disappear when the top and bottom face are distorted to fit into a cylindrical cell layer.

We found this strong bias even without a form of microtubule alignment with cell wall stresses (e.g., [22]) which, on a cylinder, are twice as large for transverse compared to longitudinal [44]. Taken together, these factors seem at odds with the natural requirement of producing longitudinal arrays when necessary. Extensive work on dark-grown hypocotyls, however, shows that reorientation from transverse to longitudinal can be a very active process in which, initially, the microtubules with the minority orientation are specifically amplified [23,45–47]. A simpler model than the one used here, however, suggests that a relatively small bias, e.g., a 10% difference in growth speed, may be sufficient to subsequently tip the balance towards longitudinal, *when combined with a finite pool of total available tubulin* [23]. Note that this difference is smaller than our maximum 24% increase in rescue rate, whereas others have used a “moderate” 80% difference in spontaneous catastrophe rate [48]. These differences among models strongly urge the experimental quantification of orientation dependent dynamics.

The orientation of the PPB also seems determined by an active process, that sometimes overrules the preceding interphase orientation, signified by the formation of a transient radial array structure [43]. This structure coincides with the observation of nuclear envelope-derived microtubules that join the cortex with independent orientation [43]. From a cortical perspective, this resembles a temporal increase of the “unbound” nucleation rate, with a spatially varying bias on orientation and intensity due to microtubule stiffness. This could aid in PPB positioning, by disrupting the established array structure in some places and strengthening it in others.

These active reorientation processes illustrate that a firm preference for one specific orientation can go hand in hand with control over array orientation.

A major open question in the field is how plant cells weigh different cues affecting the orientation of the cortical array. Such cues can be global, i.e., that always require information processing throughout the whole array, and local, i.e., that can be sensed (almost) everywhere in the cortex with similar intensity. Cell size, tuning the persistence length of microtubule growth [24,25,49], and the degree of parallel microtubule-based nucleation [17,50] can each shift the balance between local and global cues. The most prominent global cue derives directly from the cell geometry itself, as on many geometries, including cylinders, only a limited set of array orientations minimizes conflicts with itself [5,20]. Cues like penalties for crossing (sharp) edges [5,51] or cell faces with less favourable conditions can more selectively determine which orientations are realised [5,20,24]. In terms of information processing, these act as global cues.

In contrast, the co-alignment of microtubules with patterns of mechanical stress in the cell wall that seems to dominate in certain systems [21,28,39,52–54], is typically assumed to happen via local cues, e.g., implemented as a slight bias in the microtubule growth direction towards the direction of (predicted) maximum wall stress [22], or increased growth propensity for co-aligned microtubules via the modulation of microtubule dynamics in simulation studies [24,55]. The exact mechanism behind this observation remains elusive, but depends on katanin [39,54]. This microtubule severing enzyme [56,57] has a profound influence on alignment of the cortical array and is critically important for array reorientation in response to various internal or external cues [36,39,45,54,58]. Another potential local cue is the tendency of some microtubules to slowly reorient such that they minimize their curvature either globally or over a small region, e.g., favouring longitudinal orientation for non-interacting microtubules on an infinite cylinder [40,59,60]. Recent simulations show that

this effect, indeed, competes with global geometry-based effects, including induced catastrophes at the edges of cylinders [48]. It would be interesting to continue this investigation using local density-dependent (LDD-like) nucleation, to test whether LDD favours the transverse orientation also if individual microtubule tips have some tendency to deflect towards longitudinal.

Our modelling advances enable the *in silico* investigation of the plant cortical array with a high degree of realism in a fast simulation environment. With our new algorithm, the simulation platform CorticalSim now is equipped with katanin severing [36], semiflexible microtubules [25], and more realistic, i.e., local density-dependent, microtubule-based nucleation that avoids the problem of artificial inhomogeneity. We have demonstrated that the mechanism of microtubule nucleation has profound impact on array orientation and other aspects of array behaviour. Moreover, there are many open questions that will benefit from fast and realistic simulation of microtubule-based nucleation.

## Methods

We simulate the cortical array with a stochastic platform that includes all microtubules as sets of connected line segments that interact. The platform, CorticalSim, is a fast, event-based microtubule simulation platform written in C++ [11,61]. New version: [62]. In this platform, microtubules are confined to the surface of the cell membrane, in this manuscript modelled as closed cylinders or boxes, or a square/rectangular periodic domain. In the case of cylinders, microtubules have the same dynamic parameters on both the lateral surface and the two caps. In both the case of cylinders and boxes, we do not consider catastrophe associated with crossing sharp edges. Table 1 summarizes model parameters and their default values.

## Microtubule dynamics

The dynamics of microtubules comprises two main components: intrinsic dynamics and microtubule-microtubule interaction. We employed the Dogterom and Leibler model [64] to describe the intrinsic dynamics of individual microtubules augmented with hybrid treadmilling [63], see Fig 1C. Microtubules can be either in the growing state, where they extend at the plus-end with a growth speed of  $v^+$ , or in the shrinking state, where they retract their plus-end with a shrinkage speed of  $v^-$ . The minus-end of microtubules retracts at a treadmilling speed of  $v^{\text{tm}}$  independently of the state of the plus-end. Transitions between the growing and shrinking states, and *vice versa*, occur with catastrophe and rescue rates denoted as  $r_c$  and  $r_r$ , respectively.

When a growing microtubule plus-end impinges on the lattice (the lateral, cylindrical surface of a microtubule, in this model treated as a line segment) of another microtubule, the outcome depends on the collision angle, comprised between  $0^\circ$  and  $90^\circ$ . For collision angles smaller than  $\theta_c = 40^\circ$ , zippering occurs, causing the plus-end to reorient alongside the encountered microtubule. When the collision angle is wider than  $40^\circ$ , the impinging plus-end has a probability  $P_{\text{cat}}$  to undergo a collision-induced catastrophe, and a probability  $1 - P_{\text{cat}}$  to create a crossover with the other microtubule, see Fig 1D. Microtubule bundles emerge as a result of the zippering process. We assume that the collision between a growing microtubule tip and a bundle is equivalent to a collision with a single microtubule. Likewise, when a microtubule within a bundle collides with another microtubule, it remains unaffected by the presence of other microtubules within the same bundle. CorticalSim can simulate microtubule severing events induced by the severing enzyme katanin [36]. However, for simplicity, we do not consider katanin severing in this manuscript.

## Microtubule nucleation

We explore three distinct modes of microtubule nucleation: isotropic nucleation (ISO), global density-dependent nucleation (GDD), and a novel local density-dependent (LDD) nucleation algorithm. The latter consists of a new computational approach, and we compare its performance against the former two methods, already well-studied in the literature [11,17,32,33]. Regardless of the chosen nucleation mode, we assume that nucleation complex availability and behaviour are constant over time. The LDD algorithm incorporates the following experimental observations: 1) nucleation primarily occurs from the lattice of existing microtubules [12,13,30], 2) with a distribution of relative nucleation angles based on [12], and 3) observations of sparse, oryzalin treated, arrays show that nucleation complexes can appear in empty parts of the array, but have a higher nucleation efficiency after association with a microtubule [13,14].

**Isotropic (ISO).** In the case of isotropic nucleation, new microtubules are nucleated at a rate  $r_n$ . The location and orientation are randomly selected with uniform probability.

**Global density-dependence (GDD).** In the global density-dependent nucleation (GDD) case, which was developed in [17], nucleation can be either microtubule-based or background unbound nucleation. Given the total density of tubulin  $\rho$  used by microtubules, the rate at which microtubule-based nucleation occurs is

$$r_{n,MT\text{-based}} = r_n \frac{\rho}{\rho + \rho_{1/2}}, \quad (1)$$

where  $\rho_{1/2}$  is an equilibrium constant determining the density at which half of the nucleations are microtubule-based [18]. Consequently, isotropic background nucleation occurs at a rate  $r_{n,unbound} = (r_n - r_{n,MT\text{-based}})$ . This approach ensures that initial nucleations at the microtubule-free membrane are unbound, while a small fraction of unbound nucleations occurs even at higher densities. In our simulations, the locations of microtubule-based nucleation events are uniformly distributed along the length of all available microtubules.

We modelled the angular distribution of microtubule-based nucleations as proposed by Deinum et al. [17]. Their nucleation mode includes three components: forward (towards the plus-end of the parent microtubule) with probability  $f_{\text{forward}}$ , backward (towards the minus-end of the parent microtubule) with probability  $f_{\text{backward}}$ , and the remaining probability sideways, split between left ( $f_{\text{left}}$ ) and right ( $f_{\text{right}}$ ). The sideways angles are modelled proportional to the relative partial surface area from a focal point of an ellipse with eccentricity  $\epsilon$ , with its main axis oriented with branching angle  $\theta_b$  relative to the parent model. Parameters  $\epsilon$  and  $\theta_b$  are based on the data by Chan and Lloyd [12]. The full nucleation distribution function, denoted as  $\nu(\theta)$ , where  $\theta$  is the angle between the direction of the parent and the daughter microtubules, combines these components:

$$\begin{aligned} \nu(\theta) = & f_{\text{forward}}\delta(\theta) + f_{\text{backward}}\delta(\theta - \pi) \\ & + \frac{(1 - \epsilon^2)^{\frac{3}{2}}}{2\pi} \left[ f_{\text{left}} \left( \frac{1}{1 - \epsilon \cos(\theta - \theta_b)} \right)^2 + f_{\text{right}} \left( \frac{1}{1 - \epsilon \cos(\theta + \theta_b)} \right)^2 \right], \quad (2) \end{aligned}$$

where  $\delta$  is the Dirac  $\delta$ -distribution.

**Local density-dependence (LDD).** New nucleation complexes appear at the membrane at rate  $r_{\text{ins}}$  following the observation of nucleation complexes freely diffusing at the membrane [14]. These complexes are virtually placed at a random position  $\mathbf{x}_0$  within the simulation domain. For convenience, and without loss of generality, we set  $\mathbf{x}_0 = (0, 0)$  in

the remainder of this section. To define a region for nucleation, we consider a circle with a radius  $R$  centered at  $\mathbf{x}_0$ , which we call the nucleation area. Within this area, we draw  $N$  radii, each referred to as a meta-trajectory. The first meta-trajectory is drawn at a random angle  $\theta_1 \in [0, 2\pi)$  in the simulation domain, while subsequent meta-trajectories have angles  $\theta_i = \theta_{i-1} + 2\pi/N$ , see Fig 9A and 9B. A meta-trajectory labelled by  $i$  may either intersect the lattice of a first microtubule at a distance  $d_i$  from the centre or reach the boundary of the nucleation area, with  $d_i$  being equal to the radius  $R$  in the latter case. When a meta-trajectory intersects a microtubule lattice, it stops there (Fig 9B). We approximate the diffusion process by assuming that the nucleation complex can either reach these intersections by diffusion or diffuse away from the nucleation area. Here, we use  $N = 6$  to reasonably represent the possible directions of diffusion of nucleation complexes.

Following the appearance of a nucleation complex at the membrane, three outcomes are possible: (i) the nucleation complex dissociates, (ii) an unbound nucleation occurs, (iii) or the complex reaches the lattice of a microtubule. After reaching a microtubule lattice (case iii), the complex may either produce a microtubule-based nucleation or dissociate before that. In experiments, the overall probability that a nucleation complex dissociated without nucleation depended on whether such a complex was freely diffusing or attached to a microtubule lattice. In the former case, the probability of dissociation is 98%, in the latter 76% [13,14]. Ideally, the nucleation process should be modelled as a two-stage mechanism, with dissociation probabilities depending on time until reaching a microtubule lattice. Unfortunately, however, this cannot be parametrized with existing experimental data and performing the relevant measurements would be very challenging, because of the high density of most cortical arrays [13,14]. We, therefore, adopt a pragmatic approach. We first determine the likelihood of a complex reaching a microtubule lattice, leading to a tentative microtubule-based or unbound nucleation event. Subsequently, part of the tentative nucleation events are rejected based on the above dissociation probabilities.

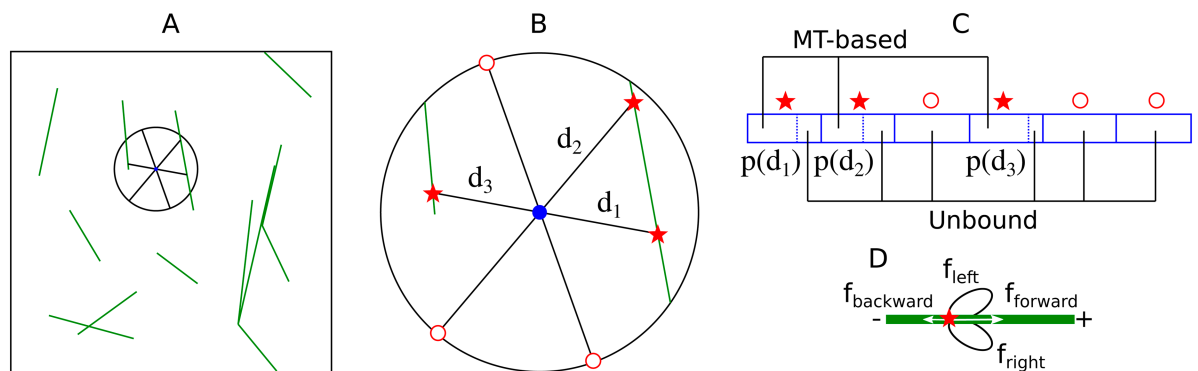

**Fig 9. Schematic overview of the LDD nucleation algorithm.** (A) The position in the simulation domain where a nucleation complex (tentatively) appears is selected randomly, with uniform distribution. (B) Such a position, represented by the blue dot, is the centre of the nucleation area (the area within in the black circle with exploration radius  $R$ ).  $N$  meta-trajectories are drawn equidistant from one another and with random orientation. Meta-trajectories are drawn up until the boundary of the nucleation area or the lattice of the first intersecting microtubule, whichever is closer. (C) Whether the resulting nucleation is microtubule-based or unbound and, in the former case, the parent microtubule and the nucleation location, is decided stochastically with probability  $p(d_i)$  weighted over the length of meta-trajectories, according to Eq (4). (D) In a microtubule-based nucleation, the angles follow Eq (2) [17]: a newly-nucleated microtubule initially grows along the parent microtubule with probability  $f_{\text{forward}}$ , in the opposite direction with probability  $f_{\text{backward}}$ , or branches to either side with probability  $f_{\text{left/right}}$ . The branching angle is determined according to a distribution that closely matches the data in [12] (Eq (2)).

<https://doi.org/10.1371/journal.pcbi.1013282.g009>

We assume a nucleation complex tentatively reaches a microtubule lattice if it does not produce an unbound nucleation before reaching the site via a 2D diffusion process. For this, we assume a constant unbound nucleation rate  $r_u$ , and take the time required to reach the site as the expected time for a mean squared displacement of distance  $d_i$ :

$$\tau_i = \frac{d_i^2}{4D}. \quad (3)$$

Consequently, the probability  $p$  that a microtubule tentatively reaches the lattice intersected by the meta-trajectory  $i$  before unbound nucleation is given by:

$$p(d_i) = 1 - \int_0^{\tau_i} dt r_u e^{-r_u t} = e^{-r_u \frac{d_i^2}{4D}}. \quad (4)$$

Hence,  $0.24 p(d_i)$  is the probability of a microtubule-based nucleation on meta-trajectory  $i$ . Similarly,  $0.02 (1 - p(d_i))$  is the probability of unbound nucleation on meta-trajectory  $i$ . In our simulations, we used a maximum meta-trajectory length of  $R = 1.5 \mu\text{m}$  because, given our choice of parameters values (Table 1), the probability  $p(R)$  of a nucleation complex intersecting with a microtubule lattice prior to nucleation becomes negligible beyond this length. Based on this, the probability of microtubule-based nucleation after a nucleation complex appears at the membrane is

$$p_{\text{MT-based}} = \frac{0.24}{N} \sum_j p(d_j), \quad (5)$$

where the sum over  $j$  only runs over meta-trajectories that intersect a microtubule, while the probability of unbound nucleation is  $0.02(1 - \sum_j p(d_j)/N)$ , see Fig 9C. Once the method was well established, we further improved computational efficiency using an equivalent, more efficient parametrization. This means a reduced appearance rate  $r'_{\text{ins}} = 0.24 \cdot r_{\text{ins}}$ , accepting all tentative bound nucleations, and accepting tentative unbound nucleations with probability  $0.08333 = 0.02/0.24$ . Both parametrizations are used in the current figures.

Verification simulations with LDD on a planar simulation domain show how the fraction of microtubule-based nucleation increases with increasing microtubule density and the nucleation rate increases to equilibrium levels (S10 Fig). At a high density around  $5 \mu\text{m}^{-1}$ , the fraction microtubule-based nucleation was somewhat lower than reported before (95% when using local density, S10 Fig, compared to 98% in [13]), which can likely be explained by the fact that, here, we do not take into account that the appearance of nucleation complexes at the membrane is biased towards existing microtubules [13,14]. As expected, the observed relation between microtubule density and fraction of microtubule-based nucleation was tighter when using the local microtubule density than the global one (S10 Fig).

### Degree of alignment and orientation of the array

To assess the alignment of microtubules in a planar system, we use a nematic order parameter  $S_2$  that accounts for the contribution of individual microtubule segments proportionally weighted on their length [17]. For planar geometries,  $S_2$  is defined by

$$S_2 = \sqrt{\langle\langle \cos 2\theta \rangle\rangle^2 + \langle\langle \sin 2\theta \rangle\rangle^2}, \quad (6)$$

where the double brackets denote a length-weighted average over all microtubule segments.  $S_2$  has a value of 0 for an isotropic system and a value of 1 for a system where microtubules are

perfectly aligned. For non-planar geometries, we use the order parameter  $R_2 \in [0, 1]$  which extends the definition of nematic order parameter to surfaces in the 3D space as defined in [11]. As the standard extension of the  $S_2$  order parameter to 3D would produce non-zero values for isotropic arrays on cylinders and boxes, because of the confinement of the microtubules to the surface, the definition of  $R_2$  includes a correction for the expected value for a fully isotropic array. Consequently, the maximum  $R_2$  value depends on array orientation: for example, it is 1 for transverse arrays and  $(1+D/L)/2$  for longitudinal arrays on cylindrical arrays with length  $L >$  diameter  $D$ . The minimal value is always 0. Only in Fig 5,  $R_2$  values are renormalized by this maximum.

We couple the alignment order parameter  $S_2$  with the overall array orientation  $\Theta_2$ :

$$\Theta_2 = \arctan\left(\frac{\langle\langle \sin 2\theta \rangle\rangle}{\langle\langle \cos 2\theta \rangle\rangle + S_2}\right). \quad (7)$$

On non-planar geometries (capped cylinders and boxes in this manuscript), we use the definition of orientation vector  $\Theta_2$  coupled to  $R_2$  [11]. This is the angle between the cylinder axis and the direction most *avoided* by the array, i.e., the predicted preferred direction of cell expansion. Note that this is the opposite of  $S_2$ -based  $\Theta_2$ . We, therefore, indicate the longitudinal and transverse orientation alongside the relevant figures to avoid confusion.

**Array orientation distributions on 3D shapes.** For the orientation distribution plots of 3D shapes (boxes and cylinders; Fig 8, S5 Fig, S6 Fig), we used the orientation vector related to  $R_2$  (see above), which has unit length. This vector was first mapped onto the positive octant of a sphere using zero or more reflections, and subsequently projected onto a flat surface. The projection was chosen such, that the three corners of the octant (corresponding to the  $x$ ,  $y$ , and  $z$ -unit vectors, where the cylinder is oriented around the  $x$ -axis) visually appear the same for the same density, and the body diagonal  $(x, y, z) = (\frac{1}{3}\sqrt{3}, \frac{1}{3}\sqrt{3}, \frac{1}{3}\sqrt{3})$  appears in the centre. The plots are oriented such that a transverse array (on a cylinder) corresponds to the top of the plot. The horizontal and vertical screen coordinates  $(X, Y)$  are computed as follows:

$$\begin{aligned} X &= \frac{1}{2}\sqrt{2}(-|y| + |z|) \\ Y &= |x| - \frac{1}{2}(|y| + |z|) \end{aligned} \quad (8)$$

Next to the plot, a histogram is plotted of the vertical position in the plot,

$$C_2 = |x| - \frac{1}{2}\sqrt{y^2 + z^2}. \quad (9)$$

These histograms (more precisely, modified violin plots made with R ggplot2) are scaled per plot. Equal area at the top and bottom means that transverse and longitudinal orientation occur with equal frequency.

### Navigating parameter space with control parameter $G$

The driver of spontaneous alignment in the cortical array is the occurrence of sufficient interactions within the average microtubule length. This is quantified by a single control parameter  $G$  [8,9], which is the ratio of two length scales: an interaction length scale (left factor) and the average length of non-interacting microtubules (right factor). We use a version of  $G$  adjusted

for minus end treadmilling [17]:

$$G = \left( \frac{2(v^+ - v^{\text{tm}})^2(v^- + v^{\text{tm}})}{r_n v^+(v^+ + v^-)} \right)^{1/3} \left( \frac{r_r}{v^- + v^{\text{tm}}} - \frac{r_c}{v^+ - v^{\text{tm}}} \right). \quad (10)$$

Note that we restrict ourselves to  $G < 0$ , i.e., when microtubules are in the so-called bounded-growth regime, where they have a finite life span and finite intrinsic length. In this case, spontaneous alignment occurs if  $G > G^*$ , some threshold that depends on the details of microtubule-microtubule interactions.

For ISO and GDD nucleation modes, the nucleation rate  $r_n$  is an explicit simulation parameter. For LDD nucleation, however,  $r_n$  results from the interplay between the rate at which nucleation complexes appear at the membrane  $r_{\text{ins}}$  and rejection of nucleations, which in turn depends on the density and distribution of the microtubules. Therefore, we calculate the effective nucleation rate to be used for  $G$  in Eq (10) as

$$r_n = \frac{n_c(T)}{TA}, \quad (11)$$

where  $n_c(T)$  is the number of nucleation events occurred until time  $T$ , and  $A$  is the area of the simulation domain. In principle,  $n_c$  might be non-linear in  $T$ , making our proposed computation of  $r_n$  overly-simplistic. However, our test showed that  $n_c(T)$  is approximately linear in  $T$ , for  $T < 3 \times 10^4$  s (8 h, 20 min), see S9 Fig.

### Global and local bias on cylindrical geometry

We incorporated two distinct directional biases independently: a global bias, represented by an 8% increase in the catastrophe rate  $r_c$  at the cylinder caps, and a local bias, with a maximum  $b_{\text{max}}$  (default: 8%) orientation dependent increase of the rescue rate  $r_r$  for individual microtubules. Similar to others [23,48,65], we used a cosine function to model the increase:

$$r_{r,\text{extra}} = \frac{b_{\text{max}}}{2} [1 + \cos(2(\theta - \theta_r))], \quad (12)$$

where  $\theta$  denotes the orientation of the microtubule plus-end,  $\theta_r$  represents the angle at which the rescue rate is maximum, and  $b_{\text{max}}$  is the maximal increase factor when  $\theta = \theta_r$ .

### Supporting information

**S1 Fig. Variability information of Fig 3.** (A) Median over 100 independent simulation runs per parameter combination of the order parameter  $S_2$  as function of the control parameter  $G$  at  $T = 3 \times 10^4$  s (8 h, 20 min), for LDD, GDD, and ISO nucleation modes in a squared geometry with size  $L = 40 \mu\text{m}$  and  $H = 40 \mu\text{m}$ , as depicted in Fig 3. Error bars represent the 10th and 90th percentile. (B) Median of the parameter  $S_2$  as a function of  $G$  for LDD as in panel (A), with the addition of error bars on the  $G$ -axis.

(EPS)

**S2 Fig. Impact of reduced or equal unbound nucleation rate.** Median over 100 independent simulation runs of the order parameter  $S_2$  (A,B) as function of the control parameter  $G$  at  $T = 3 \times 10^4$  s (8 h, 20 min), and (C) as a function of time for LDD, GDD, and ISO nucleation modes as in Fig 3 and S1 Fig, supplemented by LDD with equal rates for bound and unbound nucleation (LDD equal rates), and GDD with an unbound nucleation rate that is

8.3% of the bound rate (GDD unbound reduced), on a square periodic geometry with sizes  $L = 40 \mu\text{m}$  and  $H = 40 \mu\text{m}$ . (C) In these simulations, in the case of LDD with equal rates  $r_c = 0.0025 \text{ s}^{-1}$ , in the case of GDD with unequal rates  $r_c = 0.00325 \text{ s}^{-1}$ . Error bars represent the 10th and 90th percentile.

(EPS)

**S3 Fig. LDD selects for more transverse arrays than GDD and ISO.** Number of aligned arrays at  $T = 3 \times 10^4 \text{ s}$  (8 h, 20 min) with a transverse (filled symbols) or longitudinal (empty symbols) for the LDD (green squares), GDD (black circles), and ISO (blue triangles) cases, for different values of the longitudinal bias in  $r_{r,\text{extra}}$  according to Eq (12). The simulation domain is a cylinder of (A)  $40 \mu\text{m}$  length and  $12 \mu\text{m}$  diameter, and (B)  $60 \mu\text{m}$  length and  $18 \mu\text{m}$  diameter. The upper horizontal axis translates the increased rescue rate into the maximum increase in  $G$  in either the transverse or longitudinal directions. Error bars have been omitted because they are approximately the same size as the symbols. In these simulations,  $r_c = 0.00225 \text{ s}^{-1}$ .

(EPS)

**S4 Fig. Dependence of global alignment on geometry size and aspect ratio for all nucleation modes.** Median over 100 simulation runs of the degree of alignment  $S_2$  as a function of the control parameter  $G$  for LDD, GDD, and ISO nucleation modes for (A–C) increasing size and (D–F) increasing height-to-length aspect ratio of the planar periodic simulation domain, at  $T = 3 \times 10^4 \text{ s}$  (8 h, 20 min). (B,C,E,F) In the ISO and GDD cases, results for the  $L = 20 \mu\text{m}$ ,  $H = 20 \mu\text{m}$  grid are shifted to the right on the  $G$  axis by 0.005, whereas results for the  $L = 80 \mu\text{m}$ ,  $H = 80 \mu\text{m}$  and the  $L = 20 \mu\text{m}$ ,  $H = 80 \mu\text{m}$  grids are shifted to the left by 0.005 for visibility of the error bars. Error bars represent the 10<sup>th</sup> to 90<sup>th</sup> percentile.

(EPS)

**S5 Fig. Extension of Fig 8: Nucleation mode has a strong impact on sensitivity to geometry.** Orientation of  $n = 2000$  arrays at  $T = 3 \times 10^4 \text{ s}$  (8 h, 20 min) on different geometries with the same total surface area. Individual points are coloured by  $R_2$  value. Note that this measure of alignment has an orientation and geometry dependent maximum value  $\leq 1$ . The basis for the surface area is a cylinder of  $L = 40 \mu\text{m}$  and diameter  $D = 12 \mu\text{m}$  from Fig 4A. For cylinders,  $L$  is varied as indicated, and diameter adjusted to maintain the same total surface area. This has approximately the same surface area as a  $L \times W \times W = 17 \times 17 \times 17 \mu\text{m}^3$  box. For boxes, length  $L$  is varied as indicated and width  $W$  is adjusted accordingly to maintain the same total surface area. Cartoons are indicative of aspect ratios. Histograms at the side of each plot show the relative distribution of transverse (top) to longitudinal (bottom) orientations. The highest peak in each histogram has a fixed height, i.e., the histograms are scaled differentially. In these simulations,  $r_c = 0.00175 \text{ s}^{-1}$ .

(TIF)

**S6 Fig. (Relative) rate of unbound (vs. bound) nucleation has a strong impact on array orientation with LDD nucleation.** Orientation of  $n = 2000$  arrays at  $T = 3 \times 10^4 \text{ s}$  (8 h, 20 min) on different cylinders with the same total surface area as in Fig 8. From top to bottom, the rate of unbound nucleation increases as indicated. Rates are expressed as a percentage of the bound nucleation rate. The bottom row shows isotropic nucleation as a reference. As the nucleation rates for bound and unbound complexes become more equal (=towards the bottom), LDD starts behaving more similar to ISO, but always retains a stronger preference for transverse than ISO. Individual points are coloured by  $R_2$  value. Note that this measure of alignment has an orientation and geometry dependent maximum value  $\leq 1$ . The basis for the surface area is a cylinder of  $L = 40 \mu\text{m}$  and diameter of  $12 \mu\text{m}$  from Fig 4A.  $L$  is varied as indicated, and diameter adjusted to maintain the same total surface area. Histograms at the side

of each plot show the relative distribution of transverse (top) to longitudinal (bottom) orientations. The highest peak in each histogram has a fixed height, i.e., the histograms are scale differentially. In these simulations,  $r_c = 0.00225 \text{ s}^{-1}$  or  $r_c = 0.00175 \text{ s}^{-1}$ , as indicated.

(TIF)

**S7 Fig. LDD nucleation is bias-free for orientation on a square periodic geometry, suggesting that the preference for the shortest few closed paths around this geometry with GDD is a consequence of the inhomogeneity problem.** Distribution of  $S_2$  and  $\Theta_2$  for three different regimes. Each panel contains the result in terms of alignment  $S_2$  and orientation  $\Theta_2$  of 2000 independent runs at  $T = 3 \times 10^4 \text{ s}$  (8 h, 20 min). A point located along the horizontal axis represents a perfectly transverse array orientation, while a point on the vertical axis represents a perfectly longitudinal orientation. The distance of the point from the origin indicates the strength of the alignment, with greater distances indicating a higher degree of alignment. The data points are collected to generate histograms for the distribution of  $S_2$  (horizontal axis) and  $\Theta_2$  (vertical axis).  $G$  values: (A)  $G = -0.22$ , (B)  $G = -0.25$ , (C)  $G = -0.42$ , (D)  $G = -0.23$ , (E)  $G = -0.25$ , (F)  $G = -0.54$ , (G)  $G = -0.16$ , (H)  $G = -0.18$ , (I)  $G = -0.25$ . Panels (A), (D), and (G) correspond to the empty markers of Fig 3A.

(EPS)

**S8 Fig. Snapshots of the simulated cortical array for (A) GDD and (B) LDD nucleation modes at four different time points.** Simulation domain: cylinder with length =  $40 \mu\text{m}$ , diameter =  $12 \mu\text{m}$ . In these simulations:  $r_c = 0.0025 \text{ s}^{-1}$ .

(EPS)

**S9 Fig. The nucleation rate remains roughly constant throughout the simulation.** Cumulative number of nucleation events as a function of time for one simulation run with LDD nucleation mode and in a square simulation domain with periodic boundary conditions and size  $L = 40 \mu\text{m}$ . The black line corresponds to the fitting function  $f(t) = a + bt$ , with  $a = -809 \pm 153$  and  $b = 0.72 \pm 0.01$ . In this simulation,  $r_c = 0.0025 \text{ s}^{-1}$ .

(EPS)

**S10 Fig. LDD microtubule-based nucleation naturally results in a local microtubule density-dependent fraction of microtubule-based nucleation.** Fraction of microtubule-based nucleation as a function of (A) local and (B) global microtubule density ( $\rho$ ) during a single simulation run. In this simulation,  $r_c = 0.0025 \text{ s}^{-1}$ . The global microtubule density (B) was computed as expected as  $\rho = \sum_i l_i / A$ , where  $l_i$  represents the length of the  $i$ -th microtubule, the summation runs over all microtubules, and  $A$  denotes the area of the simulation domain. The local microtubule density (A) was determined via  $\rho = \sum_{i,j} l_{ij} / \sum_j A_j$ . In this expression,  $l_{ij}$  represents the length of the segment of the  $i$ -th microtubule within region  $j$  with area  $A_j$ , and  $j$  runs over all regions touched by the meta-trajectories drawn from the appearance point of a nucleation complex, as shown by the schematic in panel A. The curves fit through the data are of the same shape as the formula used for determining the fraction of microtubule-based nucleation with the GDD microtubule-based nucleation algorithm.

(EPS)

## Author contributions

**Conceptualization:** Marco Saltini, Eva E. Deinum.

**Formal analysis:** Marco Saltini, Eva E. Deinum.

**Funding acquisition:** Eva E. Deinum.

**Investigation:** Marco Saltini, Eva E. Deinum.

**Software:** Marco Saltini, Eva E. Deinum.

**Supervision:** Eva E. Deinum.

**Visualization:** Marco Saltini, Eva E. Deinum.

**Writing – original draft:** Marco Saltini, Eva E. Deinum.

**Writing – review & editing:** Marco Saltini, Eva E. Deinum.

## References

1. Ehrhardt DW, Shaw SL. Microtubule dynamics and organization in the plant cortical array. *Annu Rev Plant Biol.* 2006;57:859–75. <https://doi.org/10.1146/annurev.arplant.57.032905.105329> PMID: 16669785
2. Sablowski R. Coordination of plant cell growth and division: collective control or mutual agreement?. *Curr Opin Plant Biol.* 2016;34:54–60. <https://doi.org/10.1016/j.pbi.2016.09.004> PMID: 27723536
3. Wasteneys GO. Microtubule organization in the green kingdom: chaos or self-order?. *J Cell Sci.* 2002;115(Pt 7):1345–54. <https://doi.org/10.1242/jcs.115.7.1345> PMID: 11896182
4. Chan J, Coen E. Interaction between autonomous and microtubule guidance systems controls cellulose synthase trajectories. *Curr Biol.* 2020;30(5):941–947.e2. <https://doi.org/10.1016/j.cub.2019.12.066> PMID: 32037093
5. Chakraborty B, Willemsen V, de Zeeuw T, Liao C-Y, Weijers D, Mulder B, et al. A plausible microtubule-based mechanism for cell division orientation in plant embryogenesis. *Curr Biol.* 2018;28(19):3031–3043.e2. <https://doi.org/10.1016/j.cub.2018.07.025> PMID: 30245102
6. Gutierrez R, Lindeboom JJ, Paredez AR, Emons AMC, Ehrhardt DW. Arabidopsis cortical microtubules position cellulose synthase delivery to the plasma membrane and interact with cellulose synthase trafficking compartments. *Nat Cell Biol.* 2009;11(7):797–806. <https://doi.org/10.1038/ncb1886> PMID: 19525940
7. Paredez AR, Somerville CR, Ehrhardt DW. Visualization of cellulose synthase demonstrates functional association with microtubules. *Science.* 2006;312(5779):1491–5.
8. Tindemans SH, Hawkins RJ, Mulder BM. Survival of the aligned: ordering of the plant cortical microtubule array. *Phys Rev Lett.* 2010;104(5):058103. <https://doi.org/10.1103/PhysRevLett.104.058103> PMID: 20366797
9. Deinum EE, Mulder BM. Modelling the role of microtubules in plant cell morphology. *Curr Opin Plant Biol.* 2013;16(6):688–92. <https://doi.org/10.1016/j.pbi.2013.10.001> PMID: 24157061
10. Dixit R, Cyr R. Encounters between dynamic cortical microtubules promote ordering of the cortical array through angle-dependent modifications of microtubule behavior. *Plant Cell.* 2004;16(12):3274–84. <https://doi.org/10.1105/tpc.104.026930> PMID: 15539470
11. Tindemans SH, Deinum EE, Lindeboom JJ, Mulder B. Efficient event-driven simulations shed new light on microtubule organisation in the plant cortical array. *Frontiers in Physics.* 2014;2(19):9.
12. Chan J, Sambade A, Calder G, Lloyd C. Arabidopsis cortical microtubules are initiated along, as well as branching from, existing microtubules. *Plant Cell.* 2009;21(8):2298–306. <https://doi.org/10.1105/tpc.109.069716> PMID: 19706794
13. Nakamura M, Ehrhardt DW, Hashimoto T. Microtubule and katanin-dependent dynamics of microtubule nucleation complexes in the acentrosomal Arabidopsis cortical array. *Nat Cell Biol.* 2010;12(11):1064–70. <https://doi.org/10.1038/ncb2110> PMID: 20935636
14. Jacobs B, Schneider R, Molenaar J, Filion L, Deinum EE. Microtubule nucleation complex behavior is critical for cortical array homogeneity and xylem wall patterning. *Proc Natl Acad Sci U S A.* 2022;119(50):e2203900119. <https://doi.org/10.1073/pnas.2203900119> PMID: 36475944
15. Schneider R, Klooster KV, Picard KL, van der Gucht J, Demura T, Janson M, et al. Long-term single-cell imaging and simulations of microtubules reveal principles behind wall patterning during proto-xylem development. *Nat Commun.* 2021;12(1):669. <https://doi.org/10.1038/s41467-021-20894-1> PMID: 33510146

16. Sambade A, Pratap A, Buschmann H, Morris RJ, Lloyd C. The influence of light on microtubule dynamics and alignment in the Arabidopsis hypocotyl. *Plant Cell*. 2012;24(1):192–201. <https://doi.org/10.1105/tpc.111.093849> PMID: 22294618
17. Deinum EE, Tindemans SH, Mulder BM. Taking directions: the role of microtubule-bound nucleation in the self-organization of the plant cortical array. *Phys Biol*. 2011;8(5):056002. <https://doi.org/10.1088/1478-3975/8/5/056002> PMID: 21791726
18. Foteinopoulos P, Mulder BM. The effect of anisotropic microtubule-bound nucleations on ordering in the plant cortical array. *Bull Math Biol*. 2014;76(11):2907–22. <https://doi.org/10.1007/s11538-014-0039-3> PMID: 25348063
19. Chakraborty B, Blilou I, Scheres B, Mulder BM. A computational framework for cortical microtubule dynamics in realistically shaped plant cells. *PLoS Computational Biology*. 2018;14(2):e1005959. <https://doi.org/10.1371/journal.pcbi.1005959>
20. Deinum EE, Mulder BM. Modelling the plant microtubule cytoskeleton. *Mathematical modelling in plant biology*. Springer; 2018. p. 53–67. [https://doi.org/10.1007/978-3-319-99070-5\\_4](https://doi.org/10.1007/978-3-319-99070-5_4)
21. Hamant O, Heisler MG, Jönsson H, Krupinski P, Uyttewaal M, Bokov P, et al. Developmental patterning by mechanical signals in Arabidopsis. *Science*. 2008;322(5908):1650–5. <https://doi.org/10.1126/science.1165594> PMID: 19074340
22. Mirabet V, Krupinski P, Hamant O, Meyerowitz EM, Jönsson H, Boudaoud A. The self-organization of plant microtubules inside the cell volume yields their cortical localization, stable alignment, and sensitivity to external cues. *PLoS Comput Biol*. 2018;14(2):e1006011. <https://doi.org/10.1371/journal.pcbi.1006011> PMID: 29462151
23. Saltini M, Mulder BM. A plausible mechanism for longitudinal lock-in of the plant cortical microtubule array after light-induced reorientation. *Quant Plant Biol*. 2021;2:e9. <https://doi.org/10.1017/qpb.2021.9> PMID: 37077209
24. Saltini M, Deinum EE. Microtubule simulations in plant biology: a field coming to maturity. *Curr Opin Plant Biol*. 2024;81:102596. <https://doi.org/10.1016/j.pbi.2024.102596> PMID: 38981324
25. Jacobs B, Saltini M, Molenaar J, Filion L, Deinum EE. Microtubule flexibility, microtubule-based nucleation and ROP pattern co-alignment enhance protoxylem microtubule patterning. *Quant Plant Biol*. 2025;6:e2. <https://doi.org/10.1017/qpb.2024.17> PMID: 39944474
26. Hawkins T, Mirigian M, Selcuk Yasar M, Ross JL. Mechanics of microtubules. *J Biomech*. 2010;43(1):23–30. <https://doi.org/10.1016/j.jbiomech.2009.09.005> PMID: 19815217
27. Durand-Smet P, Spelman TA, Meyerowitz EM, Jönsson H. Cytoskeletal organization in isolated plant cells under geometry control. *Proc Natl Acad Sci U S A*. 2020;117(29):17399–408. <https://doi.org/10.1073/pnas.2003184117> PMID: 32641513
28. Colin L, Chevallier A, Tsugawa S, Gacon F, Godin C, Viasnoff V. Cortical tension overrides geometrical cues to orient microtubules in confined protoplasts. *Proceedings of the National Academy of Sciences*. 2020.
29. Gomez JM, Chumakova L, Bulgakova NA, Brown NH. Microtubule organization is determined by the shape of epithelial cells. *Nat Commun*. 2016;7:13172. <https://doi.org/10.1038/ncomms13172> PMID: 27779189
30. Murata T, Sonobe S, Baskin TI, Hyodo S, Hasezawa S, Nagata T, et al. Microtubule-dependent microtubule nucleation based on recruitment of gamma-tubulin in higher plants. *Nat Cell Biol*. 2005;7(10):961–8. <https://doi.org/10.1038/ncb1306> PMID: 16138083
31. Yagi N, Fujita S, Nakamura M. Plant microtubule nucleating apparatus and its potential signaling pathway. *Curr Opin Plant Biol*. 2024;82:102624. <https://doi.org/10.1016/j.pbi.2024.102624> PMID: 39232346
32. Allard JF, Wasteneys GO, Cytrynbaum EN. Mechanisms of self-organization of cortical microtubules in plants revealed by computational simulations. *Mol Biol Cell*. 2010;21(2):278–86. <https://doi.org/10.1091/mbc.e09-07-0579> PMID: 19910489
33. Eren EC, Dixit R, Gautam N. A three-dimensional computer simulation model reveals the mechanisms for self-organization of plant cortical microtubules into oblique arrays. *Mol Biol Cell*. 2010;21(15):2674–84. <https://doi.org/10.1091/mbc.e10-02-0136> PMID: 20519434
34. Jacobs B. CorticalSimple. 2022. <https://doi.org/10.5281/zenodo.6401900>
35. Motta MR, Nedelec F, Woelken E, Saville H, Jacquerie C, Pastuglia M, et al. The cell cycle controls spindle architecture in Arabidopsis by modulating the augmin pathway. *bioRxiv*. 2023:2023–11.
36. Deinum EE, Tindemans SH, Lindeboom JJ, Mulder BM. How selective severing by katanin promotes order in the plant cortical microtubule array. *Proc Natl Acad Sci U S A*. 2017;114(27):6942–7. <https://doi.org/10.1073/pnas.1702650114> PMID: 28630321
37. Hawkins RJ, Tindemans SH, Mulder BM. Model for the orientational ordering of the plant microtubule cortical array. *Phys Rev E Stat Nonlin Soft Matter Phys*. 2010;82(1 Pt 1):011911. <https://doi.org/10.1103/PhysRevE.82.011911> PMID: 20866652

38. Lindeboom JJ, Lioutas A, Deinum EE, Tindemans SH, Ehrhardt DW, Emons AMC, et al. Cortical microtubule arrays are initiated from a nonrandom prepatter driven by atypical microtubule initiation. *Plant Physiol.* 2013;161(3):1189–201. <https://doi.org/10.1104/pp.112.204057> PMID: 23300168
39. Eng RC, Schneider R, Matz TW, Carter R, Ehrhardt DW, Jönsson H. KATANIN and CLASP function at different spatial scales to mediate microtubule response to mechanical stress in *Arabidopsis* cotyledons. *Current Biology.* 2021.
40. Tian TYY, Macdonald CB, Cytrynbaum EN. A stochastic model of cortical microtubule anchoring and mechanics provides regulatory control of microtubule shape. *Bull Math Biol.* 2023;85(11):103. <https://doi.org/10.1007/s11538-023-01211-x> PMID: 37725222
41. Dahiya P, Bürstenbinder K. The making of a ring: assembly and regulation of microtubule-associated proteins during preprophase band formation and division plane set-up. *Curr Opin Plant Biol.* 2023;73:102366. <https://doi.org/10.1016/j.pbi.2023.102366> PMID: 37068357
42. Chakraborty B. Plant cortical microtubule dynamics and cell division plane orientation. Wageningen University and Research; 2017.
43. Melogno I, Takatani S, Llanos P, Goncalves C, Kodera C, Martin M, et al. A transient radial cortical microtubule array primes cell division in *Arabidopsis*. *Proc Natl Acad Sci U S A.* 2024;121(29):e2320470121. <https://doi.org/10.1073/pnas.2320470121> PMID: 38990951
44. Geitmann A, Ortega JKE. Mechanics and modeling of plant cell growth. *Trends Plant Sci.* 2009;14(9):467–78. <https://doi.org/10.1016/j.tplants.2009.07.006> PMID: 19717328
45. Lindeboom JJ, Nakamura M, Hibbel A, Shundyak K, Gutierrez R, Ketelaar T, et al. A mechanism for reorientation of cortical microtubule arrays driven by microtubule severing. *Science.* 2013;342(6163):1245533. <https://doi.org/10.1126/science.1245533> PMID: 24200811
46. Lindeboom JJ, Nakamura M, Saltini M, Hibbel A, Walia A, Ketelaar T, et al. CLASP stabilization of plus ends created by severing promotes microtubule creation and reorientation. *J Cell Biol.* 2019;218(1):190–205. <https://doi.org/10.1083/jcb.201805047> PMID: 30377221
47. Nakamura M, Lindeboom JJ, Saltini M, Mulder BM, Ehrhardt DW. SPR2 protects minus ends to promote severing and reorientation of plant cortical microtubule arrays. *J Cell Biol.* 2018;217(3):915–27. <https://doi.org/10.1083/jcb.201708130> PMID: 29339437
48. Tian TYY, Wasteneys GO, Macdonald CB, Cytrynbaum EN. Conflicting roles of cell geometry, microtubule deflection and orientation-dependent dynamic instability in cortical array organization. Cold Spring Harbor Laboratory; 2024. <https://doi.org/10.1101/2024.09.07.611822>
49. Sasaki T, Saito K, Inoue D, Serk H, Sugiyama Y, Pesquet E, et al. Confined-microtubule assembly shapes three-dimensional cell wall structures in xylem vessels. *Nat Commun.* 2023;14(1):6987. <https://doi.org/10.1038/s41467-023-42487-w> PMID: 37957173
50. Nakamura M, Yagi N, Kato T, Fujita S, Kawashima N, Ehrhardt DW, et al. *Arabidopsis* GCP3-interacting protein 1/MOZART 1 is an integral component of the  $\gamma$ -tubulin-containing microtubule nucleating complex. *Plant J.* 2012;71(2):216–25. <https://doi.org/10.1111/j.1365-313X.2012.04988.x> PMID: 22404201
51. Ambrose C, Allard JF, Cytrynbaum EN, Wasteneys GO. A CLASP-modulated cell edge barrier mechanism drives cell-wide cortical microtubule organization in *Arabidopsis*. *Nat Commun.* 2011;2:430. <https://doi.org/10.1038/ncomms1444> PMID: 21847104
52. Uyttewaal M, Burian A, Alim K, Landrein B, Borowska-Wykret D, Dedieu A. Mechanical stress acts via katanin to amplify differences in growth rate between adjacent cells in *Arabidopsis*. *Cell.* 2012;149:439.
53. Louveaux M, Julien JD, Mirabet V, Boudaoud A, Hamant O. Cell division plane orientation based on tensile stress in *Arabidopsis thaliana*. *Proceedings of the National Academy of Sciences.* 2016;113:E4294.
54. Sampathkumar A, Krupinski P, Wightman R, Milani P, Berquand A, Boudaoud A, et al. Subcellular and supracellular mechanical stress prescribes cytoskeleton behavior in *Arabidopsis* cotyledon pavement cells. *Elife.* 2014;3:e01967. <https://doi.org/10.7554/eLife.01967> PMID: 24740969
55. Smithers ET. Using mathematical modelling to understand how plant cell growth is controlled. University of Birmingham; 2022.
56. Burk DH, Liu B, Zhong R, Morrison WH, Ye ZH. A katanin-like protein regulates normal cell wall biosynthesis and cell elongation. *Plant Cell.* 2001;13(4):807–27. PMID: 11283338
57. Bichet A, Desnos T, Turner S, Grandjean O, Höfte H. BOTERO1 is required for normal orientation of cortical microtubules and anisotropic cell expansion in *Arabidopsis*. *Plant J.* 2001;25(2):137–48. <https://doi.org/10.1046/j.1365-313x.2001.00946.x> PMID: 11169190
58. Saltini M, Mulder BM. Critical threshold for microtubule amplification through templated severing. *Physical Review E.* 2020;101:052405.

59. Cosentino Lagomarsino M, Tanase C, Vos JW, Emons AMC, Mulder BM, Dogterom M. Microtubule organization in three-dimensional confined geometries: evaluating the role of elasticity through a combined in vitro and modeling approach. *Biophys J*. 2007;92(3):1046–57. <https://doi.org/10.1529/biophysj.105.076893> PMID: 17098802
60. Bachmann S, Froese R, Cytrynbaum EN. A buckling instability and its influence on microtubule orientation in plant cells. *SIAM J Appl Math*. 2019;79(5):2132–49. <https://doi.org/10.1137/19m1264588>
61. Tindemans SH, Deinum EE. Corticalsim v1.26.1. 2017. Available from: <https://doi.org/10.5281/zenodo.801852>.
62. Saltini M, Jacobs B, Deinum EE. Corticalsim v2.0.1. 2025. Available from: <https://doi.org/10.5281/zenodo.16282498>.
63. Shaw SL, Kamyar R, Ehrhardt DW. Sustained microtubule treadmilling in Arabidopsis cortical arrays. *Science*. 2003;300(5626):1715–8. <https://doi.org/10.1126/science.1083529> PMID: 12714675
64. Dogterom M, Leibler S. Physical aspects of the growth and regulation of microtubule structures. *Phys Rev Lett*. 1993;70(9):1347–50. <https://doi.org/10.1103/PhysRevLett.70.1347> PMID: 10054353
65. Li J, Szymanski DB, Kim T. Probing stress-regulated ordering of the plant cortical microtubule array via a computational approach. *BMC Plant Biol*. 2023;23(1):308. <https://doi.org/10.1186/s12870-023-04252-5> PMID: 37291489
